# Supplementary material for: Landscape mapping of shared antigenic epitopes and their cognate TCRs of tumor-infiltrating T lymphocytes in melanoma
Source: eLife journal article supplement (doi:10.7554/elife.53244), 2020-04-20
Supplement: supp [file elife-53244-supp-v1.zip]

Archive with 18 entries (18 files):
- elife_poa_e53244_Supplementary_file_2.xlsx
- elife_poa_e53244_Figure_2_figure_supplement_1.pdf
- elife_poa_e53244_Figure_5_figure_supplement_1.pdf
- elife_poa_e53244_Figure_5_figure_supplement_3.pdf
- elife_poa_e53244_Figure_1_figure_supplement_1.pdf
- elife_poa_e53244_Figure_5_figure_supplement_5.pdf
- elife_poa_e53244_Figure_6_figure_supplement_2.pdf
- elife_poa_e53244_Figure_5_figure_supplement_6.pdf
- elife_poa_e53244_Figure_4_figure_supplement_1.pdf
- elife_poa_e53244_Figure_5_figure_supplement_7.pdf
- elife_poa_e53244_Figure_6_figure_supplement_3.pdf
- elife_poa_e53244_Supplementary_file_1.xlsx
- elife_poa_e53244_Supplementary_file_3.xlsx
- elife_poa_e53244_Figure_6_figure_supplement_1.pdf
- elife_poa_e53244_Supplementary_file_4.xlsx
- elife_poa_e53244_Figure_5_figure_supplement_2.pdf
- elife_poa_e53244_Transparent_Reporting_File.docx
- elife_poa_e53244_Figure_5_figure_supplement_4.pdf
