# Supplementary material for: Landscape mapping of shared antigenic epitopes and their cognate TCRs of tumor-infiltrating T lymphocytes in melanoma
Source: eLife journal article supplement (doi:10.7554/elife.53244), 2020-04-20
Supplement: supp [file elife-53244-supp-v1.zip › elife_poa_e53244_Supplementary_file_1.xlsx]

## Sheet: 1a
Supplementary File 1a
Peptides used for initial A*01:01 multimer staining
No.	Protein	Position	Peptide sequence
1	FLT3-ITD	591	YVDFREYEYY
2	MART2	446	FLEGNEVGKTY
3	N-ras	55	ILDTAGREEY
4	MAGE-A1	161	EADPTGHSY
5	MAGE-A3	168	EVDPIGHLY
6	MAGE-A4	169	EVDPASNTY
7	Sp17	103	ILDSSEEDK
8	Tyrosinase	243	KCDICTDEY
9	Tyrosinase	146	SSDYVIPIGTY
10	Tyrosinase	intron	RSDSGQQARY
11	ABCB5	748	VSYFMQGLFY
12	ABCB5	231	LTSKELSAY
13	mn	103	MTLLTLYY
14	ABCB5	924	FSHAFIYFAY
15	ABCB5	609	LMAKRGLYY
16	CCNA1	343	TTNQFLLQY
17	LAGE1	126	FTVSGNLLF
18	MAGE-A1	239	LTQDLVQEKY
19	MAGE-A1	273	ETSYVKVLEY
20	MAGE-A1	160	KEADPTGHSY
21	MAGE-A1	147	ASESLQLVF
22	MAGE-A2	246	LMQDLVQENY
23	MAGE-A3	250	FVQENYLEY
24	MAGE-A3	68	ASSLPTTMNY
25	MAGE-A3	178	FATCLGLSY
26	MAGE-A4	247	LTQDWVQENY
27	MAGE-C1	867	FSEESSSPVDEY
28	SSX2	42	ASEKIFYVY
29	CEA	467	ITEKNSGLY
30	gp100	472	PLDCVLYRY
31	gp100	250	YLAEADLSY
32	gp100	143	WSQKRSFVY
33	NY-BR-1	1236	NVDVSSTIY
34	TRP-2	234	LTGNESFALPY
35	TRP-2	65	QTDTRPWSGPY
36	TRP-2	257	CTDELLGAA
37	Tyrosinase	225	LTGDENFTIPY
38	Tyrosinase	454	DSDPDSFQDY
39	Tyrosinase	439	FISSKDLGY
40	Tyrosinase	173	YDLFVWMHYY
41	Tyrosinase	515	LMEKEDYHSLY
42	Tyrosinase	359	QSSMHNALHIY
43	Tyrosinase	243	KCDICTDEY
44	CD274	19	FTVTVPKDLY
45	CPSF1	866	HVDQELLIY
46	cyclin D1	119	LTAEKLCIY
47	IDO1	381	GTDLMNFLK
48	mdm-2	268	LSDEDDEVY
49	p53	226	GSDCTTIHY
50	PRAME	433	LSNLTHVLY
51	survivin	47	PTENEPDLA
52	survivin	92	QFEELTLGEF
53	Telomerase	1036	ISDTASLCY
54	Telomerase	325	YAETKHFLY
55	MART1	107	LSAEQSPPPY
56	NY-ESO-1	137	LTAADHRQLQL
57	S100A4	31	KSELKELLT
58	CYP1B1	240	LVDVMPWLQY
59	HIV gp160	787	RRGWEVLKY
60	No peptide

## Sheet: 1b
Supplementary File 1b
Peptides used for initial A*02:01 multimer staining and measurement of peptide exchange efficiency
No.	Protein	Position	Peptide sequence
1	WT1	37	VLDFAPPGA
2	WT1	126	RMFPNAPYL
3	WT1	187	SLGEQQYSV
4	WT1	235	CMTWNQMNL
5	MIA	54	YMAPDCRFL
6	MIA	99	RLGYFPSSI
7	ALX1	142	LQLEELEKV
8	ALX1	170	ELTEARVQV
9	GAPDHS	358	FLGDTHSSI
10	GAPDH2	345	ILAYTEDEV
11	S100B	44	FLEEIKEQEV
12	S100B	74	FMAFVAMVT
13	ABCB5	1078	LLDEATSAL
14	ABCB5	700	VLNGTVHPV
15	EXTL1	249	VLLSPRWEL
16	EXTL1	13	FLWDAYFSS
17	EXTL1	330	WLALSASWL
18	CPN1	379	LLLPGIYTV
19	CPN1	249	KLFQKLAKV
20	CPN1	297	YLHTNCFEI
21	TSPAN10	81	FLSNFPFSL
22	TSPAN10	94	ALAIGLWGL
23	TSPAN10	142	ALCENTCLL
24	GJB1	155	LLYPGYAMV
25	GJB1	5	GLYTLLSGV
26	GJB1	147	AVFMYVFYL
27	MITF	378	LMDDTLSPV
28	MITF	142	LQMANTLPV
29	MITF	392	LLSSVSPGA
30	DUSP4	362	SQFVFSFPV
31	DUSP4	326	QLLQFESQV
32	DUSP4	53	FLAHSAGYI
33	cyclin-A1	227	FLDRFLSCM
34	cyclin-A1	341	SLIAAAAFCLA
35	HERV-K-MEL	1	MLAVISCAV
36	LAGE-1	1	MLMAQEALAFL
37	MAGE-A1	278	KVLEYVIKV
38	MAGE-A2	157	YLQLVFGIEV
39	MAGE-A3	271	FLWGPRALV
40	MAGE-A3	112	KVAELVHFL
41	MAGE-A4	230	GVYDGREHTV
42	MAGE-A9	223	ALSVMGVYV
43	MAGE-A10	254	GLYDGMEHL
44	MAGE-A12	271	FLWGPRALV
45	MAGE-C1	959	ILFGISLREV
46	MAGE-C1	1083	KVVEFLAML
47	LAGE-2	1	MLMAQEALAFL
48	SSX2	41	KASEKIFYV
49	XAGE-1b	21	RQKKIRIQL
50	CEA	691	IMIGVLVGV
51	gp100	154	KTWGQYWQV
52	gp100	177	AMLGTHTMEV
53	gp100	178	MLGTHTMEV
54	gp100	209	ITDQVPFSV
55	gp100	280	YLEPGPVTA
56	gp100	457	LLDGTATLRL
57	gp100	476	VLYRYGSFSV
58	gp100	570	SLADTNSLAV
59	gp100	619	RLMKQDFSV
60	gp100	639	RLPRIFCSC
61	NY-BR-1	904	SLSKILDTV
62	TRP-2	180	SVYDFFVWL
63	TRP-2	360	TLDSQVMSL
64	Tyrosinase	1	MLLAVLYCL
65	Tyrosinase	8	CLLWSFQTSA
66	Tyrosinase	369	YMDGTMSQV
67	CD274	15	LLNAFTVTV
68	CPSF	250	KVHPVIWSL
69	CPSF	1360	LMLQNALTTM
70	cyclin D1	101	LLGATCMFV
71	IDO1	199	ALLEIASCL
72	mdm-2	53	VLFYLGQY
73	p53	264	LLGRNSFEV
74	p53	65	RMPEAAPPV
75	PRAME	100	VLDGLDVLL
76	PRAME	142	SLYSFPEPEA
77	PRAME	300	ALYVDSLFFL
78	PRAME	425	SLLQHLIGL
79	SOX10	332	AWISKPPGV
80	SOX10	331	SAWISKPPGV
81	survivin	95	ELTLGEFLKL
82	Telomerase	865	RLVDDFLLV
83	MART1 (wild-type)	27	AAGIGILTV
84	MART1 (heteroclitic)	26	ELAGIGILTV
85	NY-ESO-1 (wild-type)	157	SLLMWITQC
86	NY-ESO-1 (heteroclitic)	157	SLLMWITQV
87	HIV pol	476	ILKEPVHGV
88	HTLV-1 tax	11	LLFGYPVYV
89	No peptide

## Sheet: 1c
Supplementary File 1c
Peptides used for initial A*24:02 multimer staining
No.	Protein	Position	Peptide sequence
1	beta-catenin	29	SYLDSGIHF
2	KM-HN-1	196	NYNNFYRFL
3	KM-HN-1	499	EYSKECLKEF
4	KM-HN-1	770	EYLSLSDKI
5	LY6K	119	RYCNLEGPPI
6	MAGE-A2	156	EYLQLVFGI
7	MAGE-A3	97	TFPDLESEF
8	MAGE-A3	113	VAELVHFLL
9	NY-ESO-1	91	YLAMPFATPME
10	SAGE	715	LYATVIHDI
11	CEA	268	QYSWFVNGTF
12	CEA	652	TYACFVSNL
13	gp100-intron4	intron 4	VYFFLPDHL
14	OA1	126	LYSACFWWL
15	Tyrosinase	206	AFLPWHRLF
16	Tyrosinase	368 or 336	IYMDGTADFSF
17	CD45	556	KFLDALISL
18	EpCAM	173	RYQLDPKFI
19	EZH2	291	KYDCFLHPF
20	EZH2	735	KYVGIEREM
21	glypican-3	298	EYILSLEEL
22	HER-2/new	63	TYLPTNASL
23	MUC5AC	716	TCQPTCRSL
24	PRAME	301	LYVDSLFFL
25	PSMA	178	NYARTEDFF
26	RNF43	721	NSQPVWLCL
27	MIA	91	YYGDLAARL
28	ALX1	216	SYPQIQNNLW
29	GAPDHS	125	RYKGSVEF
30	EXTL1	556	FYHRYYHTLF
31	CPN1	256	VYSYAHGWMF
32	TSPAN10	76	KYLIFLSNF
33	GJB1	22	VWLSVIFIF
34	DUSP4	148	RFSSEYPEF
35	cyclic-A1	302	IYPPEVDEF
36	LAGE1	87	LQLHITMPF
37	MAGE-A1	187	IMPKTGFLI
38	MAGE-A3	142	IMPKAGLLI
39	MAGE-A9	70	VYYTLWSQF
40	MAGE-A10	166	NYEDHFPLLF
41	MAGE-A12	299	SYPPLHEWAF
42	MAGE-C1	940	RYTGYFPVIF
43	SSX2	53	KYEAMTKLGF
44	SSX2	48	VYMKRKYEAM
45	XAGE-1b	29	RSQCATWKVI
46	TRP2	202	PWLKVYYYRF
47	CD274	7	IFMTYWHLL
48	cyclin D1	82	NYLDRFLSL
49	IDO1	296	RYMPPAHRNF
50	mdm-2	46	TYTMKEVLF
51	SOX10	386	HYGSAFPSI
52	NY-ESO-1	160	MWITQCFLPVF
53	NY-ESO-1	158	LLMWITQCF
54	hTERT	461	VYGFVRACL
55	WT1	126	RMFPNAPYL
56	WT1 (wild-type)	235	CMTWNQMNL
57	WT1 (heteroclitic)	235	CYTWNQMNL
58	MAGE-A4 (wild-type)	143	NYKRCFPVI
59	MAGE-A4 (heteroclitic)	143	NYKRCFPVF
60	Survivin2B	80	AYACNTSTL
61	CPN1	297	YLHTNCFEI
62	PRAME	300	ALYVDSLFFL
63	HIV env	584	RYLRDQQLL
64	HTLV-1 tax	301	SFHSLHLLF
65	No peptide

## Sheet: 1d
Supplementary File 1d
Peptides used for initial B*07:02 multimer staining and measurement of peptide exchange efficiency
No.	Protein	Position	Peptide sequence
1	RBAF600	329	RPHVPESAF
2	SYT-SSX2	402-410 (SYT), 111-112 (SSX2)	QRPYGYDQIM
3	LAGE-1	ORF2(46-54)	APRGVRMAV
4	NY-ESO-1	60	APRGPHGGAASGL
5	gp100	529	SSPGCQPPA
6	iCE Intestinal carboxyl esterase	alternative ORF	SPRWWPTCL
7	RAGE-1	11	SPSSNRIRNT
8	RU2AS	38	LPRWPPPQL
9	WT1	180	DPMGQQGSL
10	MIA	43	HPISMAVAL
11	ALX1	241	LPRDTSSCM
12	GAPDHS	196	SPDAPMFVM
13	ABCB5	1200	KARTGRTCL
14	EXTL1	46	WPRWLDAEL
15	CPN1	30	RVRGVRRTA
16	GJB1	73	HVRLWSLQL
17	MITF	177	APNSPMAML
18	DUSP4	211	AARRDMLDAL
19	cyclin A1	183	SPMLVDSSL
20	LAGE1	114	APLPRPGAVL
21	MAGE-A1	234	EPRKlLTQDL
22	MAGE-A2	241	HPRKlLMQDL
23	MAGE-A3	216	APEEKIWEEL
24	MAGE-A4	297	RVRIAYPSL
25	MAGE-A9	60	SPQGGASSSI
26	MAGE-A10	93	SPSVVASLPL
27	MAGE-A12	241	HPRKlLTQDL
28	MAGE-C1	817	FPSSTSSSL
29	NY-ESO-1	60	APRGPHGGA
30	SSX2	96	RPQMTFGRL
31	CEA	632	IPQQHTQVL
32	CEA	541	LPVSPRLQL
33	gp100	176	RAMLGTHTM
34	NY-BR-1	357	TPREITSPA
35	TRP-2	264	RPWSGPYIL
36	TRP-2	497	RLRKGYTPL
37	Tyrosinase	204	APAFlPWHRL
38	CD274	42	FPVEKQLDL
39	CPSF1	1394	AVRNVLDGEL
40	CPSF1	964	HPMAIDGPV
41	cyclin D1	133	RPEELLQMEL
42	IDO1	222	NPKAFFSVL
43	mdm-2	29	RPKPLLLKL
44	p53	84	APAPAPSWPL
45	PRAME	48	LPRELFPPL
46	PRAME	113	RPRRWKLQVL
47	survivin	130	KVRRAIEQL
48	Telomerase	4	APRCRAVRSL
49	Telomerase	444	DPRRLVQLL
50	Telomerase	1	MPRAPRCRAV
51	MAGE-A1	289	RVRFFFPSL
52	ALX1	56	LPRAEHHVRL
53	TSPAN10	231	SPGVQACSL
54	XAGE1B	3	SPKKKNQQL
55	p53	315	SPQPKKKPL
56	SOX10	126	YPHLHNAEL
57	MART1	1	MPREDAHFI
58	MART1	12	YPKKGHGHSY
59	HIV nef	128	TPGPGVRYPL
60	No peptide

## Sheet: 1e
Supplementary File 1e
Peptides used for initial B*08:01 multimer staining
No.	Protein	Position	Peptide sequence
1	BCR-ABL	922	GFKQSSKAL
2	TAG-1	42	LSRLSNRLL
3	WT1	436	NMHQRNMTKL
4	MIA	1	MARSLVCL
5	GAPDHS	83	FGRIGRLVL
6	ABCB5	765	TMRLRHLAF
7	EXTL1	665	VQRKKYRSL
8	CPN1	121	WLGNREAL
9	GJB1	29	FIFRIMVL
10	MITF	345	DMRWNKGTIL
11	DUSP4	94	RARLRSGL
12	cyclin A1	281	VLRGKLQL
13	LAGE1	-	RILSRDAAPL
14	MAGE-A1	294	FPSLREAAL
15	MAGE-A3	121	LLKYRAREPV
16	MAGE-A4	121	LLRKYRAKEL
17	MAGE-A9	107	ALKLKVAEL
18	MAGE-A10	303	HAEIRKMSL
19	MAGE-C1	918	FLLLKYQV
20	NY-ESO-1	86	RLLEFYLAM
21	SSX2	167	RLRERKQL
22	CEA	550	SNGNRTLTL
23	gp100	614	LIYRRRLM
24	NY-BR-1	1138	ILKEKNAEL
25	NY-BR-1	991	QMKKKFCVL
26	TRP-2	406	WMKRFNPP
27	Tyrosinase	499	LCRHKRKQL
28	CD274	7	FIFMTYWHL
29	CPSF	887	NLKVRFKKV
30	cyclin D1	82	MNYLDRFLSL
31	IDO1	54	QLRERVEKL
32	mdm-2	467	KLKKRNKPC
33	PRAME	464	HARLRELL
34	survivin	13	FLKDHRISTF
35	Telomerase	977	VLRLKCHSL
36	MART1	48	CRRRNGYRAL
37	MART1	56	ALMDKSLHV
38	ALX1	56	LPRAEHHVRL
39	TSPAN10	231	SPGVQACSL
40	XAGE1B	3	SPKKKNQQL
41	p53	315	SPQPKKKPL
42	SOX10	126	YPHLHNAEL
43	MAGE-A2	239	FAHPRKLL
44	CMV IE1	184	ELRRKMMYM
45	No peptide

## Sheet: 1f
Supplementary File 1f
Peptides used for initial C*05:01 multimer staining
No.	Protein	Position	Peptide sequence
1	MART1	27	AAGIGILTV
2	WT1	272	ESDNHTTPI
3	MIA	122	KTDKWDFYC
4	ALX1	257	RTDSSYTGF
5	GAPDHS	359	LGDTHSSIF
6	ABCB5	1178	LLDEATSAL
7	ABCB5	547	ILDEATSAL
8	EXTL1	577	LADEAPTCV
9	EXTL1	238	TADTGSSAC
10	CPN1	1	MSDLLSVFL
11	TSPAN10	193	YQDDPDLRF
12	GJB1	44	WGDEKSSFI
13	MITF	485	LMDDTLSPV
14	DUSP4	252	KADISSWFM
15	cyclin A1	195	FISNPPSMV
16	LAGE1	126	FTVSGNLLF
17	MAGE-A1	106	VADLVGFLL
18	MAGE-A2	263	GSDPACYEF
19	MAGE-A3	168	EVDPIGHLY
20	MAGE-A4	113	KVDELAHFL
21	MAGE-A9	94	SVDPAQLEF
22	MAGE-A10	168	YEDHFPLLF
23	MAGE-A10	347	TTDDTTAMA
24	MAGE-A12	143	FQDFFPVIF
25	MAGE-C1	967	EVDPDDSYV
26	NY-ESO-1	139	AADHRQLQL
27	SSX2	24	AFDDIAKYF
28	XAGE1B	51	NLDLGSGVK
29	CEA	581	RSDPVTLDV
30	gp100	571	LADTNSLAV
31	gp100	262	FGDSSGTLI
32	gp100	70	VSNDGPTLI
33	gp100	209	ALDGGNKHF
34	NY-BR-1	324	TPDEAASLV
35	TRP-2	176	FANCSVYDF
36	Tyrosinase	460	FQDYIKSYL
37	CD274	59	MEDKNIIQF
38	CPSF	1261	MVDNAQLGF
39	CPSF	651	VADPYVVIM
40	cyclin D1	195	FISNPPSMV
41	IDO1	126	YADCVLANW
42	mdm-2	241	VSDQFSVEF
43	mdm-2	185	KSDSISLSF
44	p53	205	YLDDRNTFR
45	PRAME	187	ACDELFSYL
46	SOX10	62	EADDDKFPV
47	survivin	51	EPDLAQCFF
48	Telomerase	846	YGDMENKLF
49	Telomerase	1036	ISDTASLCY
50	HIV rev	67	SAEPVPLQL
51	No peptide

## Sheet: 1g
Supplementary File 1g
Peptides used for initial C*07:01 multimer staining
No.	Protein	Position	Peptide sequence
1	MAGE-A2	212	EGDCAPEEK
2	MAGE-A12	169	VRIGHLYIL
3	MART1	51	RNGYRALMDKS
4	WT1	362	RRFSRSDQL
5	MIA	54	YMAPDCRFL
6	ALX1	102	LRMSPVKGM
7	GAPDHS	395	RVVDLLRYM
8	ABCB5	37	FRFADGLDI
9	EXTL1	557	FYHRYYHTL
10	CPN1	124	NREALIQFL
11	TSPAN10	217	SYQDWQQNL
12	GJB1	74	VRLWSLQLI
13	MITF	346	MRWNKGTIL
14	DUSP4	208	AYHAARRDM
15	cyclin A1	93	YRRTCGQGI
16	LAGE1	80	ARRPDSRLL
17	MAGE-A1	98	FRAVITKKV
18	MAGE-A3	18	ARGEALGLV
19	MAGE-A4	122	LRKYRAKEL
20	MAGE-A9	237	FYGEPRKLL
21	MAGE-A10	3	RAPKRQRCM
22	MAGE-A12	237	SVFAHPRKL
23	MAGE-C1	203	SRSFSSTLL
24	NY-ESO-1	80	ARGPESRLL
25	SSX2	99	MTFGRLQGI
26	XAGE1B	20	SRQKKIRIQ
27	CEA	427	YRPGVNLSL
28	gp100	613	SLIYRRRLM
29	NY-BR-1	480	YSCDSRSLF
30	TRP-2	498	LRKGYTPLM
31	Tyrosinase	500	CRHKRKQLP
32	CD274	259	FRLRKGRMM
33	CPSF	1405	NRYLYLSTM
34	cyclin D1	94	VKKSRLQLL
35	IDO1	291	FLQDMRRYM
36	mdm-2	100	YTMIYRNLV
37	p53	336	ERFEMFREL
38	PRAME	462	YLHARLREL
39	SOX10	160	LRMQHKKDH
40	survivin	20	STFKNWPFL
41	Telomerase	480	SRHNERRFL
42	MAGE-A1	289	RVRFFFPSL
43	MAGE-A2	239	FAHPRKLL
44	HIV nef	105	KRQDILDLWVY
45	No peptide

## Sheet: 1h
Supplementary File 1h
Peptides used for initial C*07:02 multimer staining and measurement of peptide exchange efficiency
No.	Protein	Position	Peptide sequence
1	MAGE-A2	212	EGDCAPEEK
2	MART1	51	RNGYRALMDKS
3	WT1	374	RRHTGVKPF
4	MIA	64	HRGQVVYVF
5	ALX1	19	FYMGAGGPL
6	GAPDHS	111	EYMVYMFKY
7	ABCB5	1022	FYPCRPDVF
8	EXTL1	189	FRPGFDVAL
9	CPN1	22	FRHHRYDDL
10	TSPAN10	80	FLSNFPFSL
11	GJB1	140	FRLLFEAVF
12	MITF	23	YYELKSQPL
13	DUSP4	300	VRLEEAFEF
14	cyclin A1	211	FRHSVVVPY
15	LAGE1	95	FSSPMEAEL
16	MAGE-A1	135	YKHCFPEIF
17	MAGE-A3	142	WQYFFPVIF
18	MAGE-A4	143	YKRCFPVIF
19	MAGE-A9	70	VYYTLWSQF
20	MAGE-A10	165	RNYEDHFPL
21	MAGE-A12	299	SYPPLHEWAF
22	MAGE-C1	939	SRYTGYFPV
23	NY-ESO-1	89	FYLAMPFAT
24	SSX2	46	FYVYMKRKY
25	CEA	317	VYAEPPKPF
26	NY-BR-1	105	HRTPLMKAL
27	TRP-2	207	YYYRFVIGL
28	Tyrosinase	420	NRESYMVPF
29	CD274	10	TYWHLLNAF
30	CPSF	88	HRLPHVLLL
31	cyclin D1	82	NYLDRFLSL
32	IDO1	297	YMPPAHRNF
33	mdm-2	95	HRKIYTMIY
34	p53	211	FRHSVVVPY
35	PRAME	446	SYEDIHGTL
36	SOX10	426	YMGPSQRPL
37	survivin	4	TLPPAWQPF
38	Telomerase	575	YRKSVWSKL
39	MART1	95	VVPNAPPAY
40	MART1	47	CRRRNGYRA
41	MART1	80	HRDSKVSL
42	MART1	79	DHRDSKVSL
43	MART1	2	REDAHFIY
44	gp100	464	RLVKRQVPL
45	gp100	150	YVWKTWGQY
46	gp100	59	CWRGGQVSL
47	gp100	637	LRLPRIFCS
48	gp100	476	LYRYGSFSV
49	MAGE-A1	289	RVRFFFPSL
50	HIV nef	105	KRQDILDLWVY
51	No peptide
52
53
54
55
56
57
58
59
60
61
62
63
64
65
66
67
68
69
70
71
72
73
74
75
76
77
78
79
80
81
82
83
84
85
86
87
88
89
90

## Sheet: 1i
Supplementary File 1i
Other peptides used for initial pHLA multimer staining
No.	Protein	Position	Peptide sequence	Allele
1	EFTUD2	668	KILDAVVAQK	A*03:01
2	GPNMB	179	TLDWLLQTPK	A*03:01
3	Myosin class I	911	KINKNPKYK	A*03:01
4	SIRT2	192	KIFSEVTLK	A*03:01
5	MAGE-A1	96	SLFRAVITK	A*03:01
6	CEA	61	HLFGYSWYK	A*03:01
7	gp100	614	LIYRRRLMK	A*03:01
8	gp100	17	ALLAVGATK	A*03:01
9	mammaglobin-A	23	PLLENVISK	A*03:01
10	FGF5	172-176 and 204-207	NTYASPRFK	A*03:01
11	HER-2/neu	754	VLRENTSPK	A*03:01
12	MMP-7	96	SLFPNSPKWTSK	A*03:01
13	RGS5	74	GLASFKSFLK	A*03:01
14	RhoC	176	RAGLQVRKNK	A*03:01
15	gp100	87-95	ALNFPGSQK	A*03:01
16	gp100	40-42 and 47-52	RTKQLYPEW	A*32:01
17	MAGE-A3	167	MEVDPIGHLY	B*18:01
18	NY-ESO-1	88	LEFYLAMPF	B*18:01
19	HIV gag	161	FRDYVDRFYK	B*18:01
20	VEGF	untranslated region	SRFGGAVVR	B*27:05
21	MAGE-A3	114	AELVHFLLL	B*40:01
22	HIV nef	92	KEKGGLEGL	B*40:01
23	KIAAO205	262	AEPINIQTW	B*44:02
24	MUM-1	30	EEKLIVVLF	B*44:02
25	MUM-2	123	SELFRSGLDSY	B*44:02
26	OS-9	438	KELEGILLL	B*44:02
27	MAGE-C2	307	SESIKKKVL	B*44:02
28	Tyrosinase	192	SEIWRDIDF	B*44:02
29	MAGE-A3	167	MEVDPIGHLY	B*44:02
30	MART1	24	AEEAAGIGIL	B*45:01
31	NY-ESO-1	94	MPFATPMEA	B*51:01
32	MAGE-A1	62	SAFPTTINF	C*02:02
33	MAGE-A1	230	SAYGEPRKL	C*03:04
34	NY-ESO-1	92	LAMPFATPM	C*03:04
35	HIV gag	164	YVDRFFKTL	C*03:04
36	MUM-2	126	FRSGLDSYV	C*06:02
37	GAGE-1,2,8	9	YRPRPRRY	C*06:02
38	NY-ESO-1	80	ARGPESRLL	C*06:02
39	HIV nef	120	YFPDWQNYT	C*06:02
40	gp100	71	SNDGPTLI	C*08:02
41	TRP-2	387	ANDPIFVVL	C*08:02
42	gp100	71	SNDGPTLI	C*08:03
43	TRP-2	387	ANDPIFVVL	C*08:03
