# Supplementary material for: Landscape mapping of shared antigenic epitopes and their cognate TCRs of tumor-infiltrating T lymphocytes in melanoma
Source: eLife journal article supplement (doi:10.7554/elife.53244), 2020-04-20
Supplement: supp [file elife-53244-supp-v1.zip › elife_poa_e53244_Supplementary_file_2.xlsx]

## Sheet: 2a
2
MART1-derived overlapping peptides
Position	Peptide sequence
1	MPREDAHFIYGYPKKGHGHS
6	AHFIYGYPKKGHGHSYTTAE
11	GYPKKGHGHSYTTAEEAAGI
16	GHGHSYTTAEEAAGIGILTV
21	YTTAEEAAGIGILTVILGVL
26	EAAGIGILTVILGVLLLIGC
31	GILTVILGVLLLIGCWYCRR
36	ILGVLLLIGCWYCRRRNGYR
41	LLIGCWYCRRRNGYRALMDK
46	WYCRRRNGYRALMDKSLHVG
51	RNGYRALMDKSLHVGTQCAL
56	ALMDKSLHVGTQCALTRRCP
61	SLHVGTQCALTRRCPQEGFD
66	TQCALTRRCPQEGFDHRDSK
71	TRRCPQEGFDHRDSKVSLQE
76	QEGFDHRDSKVSLQEKNCEP
81	HRDSKVSLQEKNCEPVVPNA
86	VSLQEKNCEPVVPNAPPAYE
91	KNCEPVVPNAPPAYEKLSAE
96	VVPNAPPAYEKLSAEQSPPP
99	NAPPAYEKLSAEQSPPPYSP

## Sheet: 2b
Supplementary File 2b
NY-ESO-1-derived overlapping peptides
Position	Peptide sequence
1	MQAEGRGTGGSTGDADGPGG
6	RGTGGSTGDADGPGGPGIPD
11	STGDADGPGGPGIPDGPGGN
16	DGPGGPGIPDGPGGNAGGPG
21	PGIPDGPGGNAGGPGEAGAT
26	GPGGNAGGPGEAGATGGRGP
31	AGGPGEAGATGGRGPRGAGA
36	EAGATGGRGPRGAGAARASG
41	GGRGPRGAGAARASGPGGGA
46	RGAGAARASGPGGGAPRGPH
51	ARASGPGGGAPRGPHGGAAS
56	PGGGAPRGPHGGAASGLNGC
61	PRGPHGGAASGLNGCCRCGA
66	GGAASGLNGCCRCGARGPES
71	GLNGCCRCGARGPESRLLEF
76	CRCGARGPESRLLEFYLAMP
81	RGPESRLLEFYLAMPFATPM
86	RLLEFYLAMPFATPMEAELA
91	YLAMPFATPMEAELARRSLA
96	FATPMEAELARRSLAQDAPP
101	EAELARRSLAQDAPPLPVPG
106	RRSLAQDAPPLPVPGVLLKE
111	QDAPPLPVPGVLLKEFTVSG
116	LPVPGVLLKEFTVSGNILTI
121	VLLKEFTVSGNILTIRLTAA
126	FTVSGNILTIRLTAADHRQL
131	NILTIRLTAADHRQLQLSIS
136	RLTAADHRQLQLSISSCLQQ
141	DHRQLQLSISSCLQQLSLLM
146	QLSISSCLQQLSLLMWITQC
151	SCLQQLSLLMWITQCFLPVF
156	LSLLMWITQCFLPVFLAQPP
161	WITQCFLPVFLAQPPSGQRR

## Sheet: 2c
Supplementary File 2c
SSX2-derived overlapping peptides
Position	Peptide sequence
1	MNGDDAFARRPTVGAQIPEK
6	AFARRPTVGAQIPEKIQKAF
11	PTVGAQIPEKIQKAFDDIAK
16	QIPEKIQKAFDDIAKYFSKE
21	IQKAFDDIAKYFSKEEWEKM
26	DDIAKYFSKEEWEKMKASEK
31	YFSKEEWEKMKASEKIFYVY
36	EWEKMKASEKIFYVYMKRKY
41	KASEKIFYVYMKRKYEAMTK
46	IFYVYMKRKYEAMTKLGFKA
51	MKRKYEAMTKLGFKATLPPF
56	EAMTKLGFKATLPPFMCNKR
61	LGFKATLPPFMCNKRAEDFQ
66	TLPPFMCNKRAEDFQGNDLD
71	MCNKRAEDFQGNDLDNDPNR
76	AEDFQGNDLDNDPNRGNQVE
81	GNDLDNDPNRGNQVERPQMT
86	NDPNRGNQVERPQMTFGRLQ
91	GNQVERPQMTFGRLQGISPK
96	RPQMTFGRLQGISPKIMPKK
101	FGRLQGISPKIMPKKPAEEG
106	GISPKIMPKKPAEEGNDSEE
111	IMPKKPAEEGNDSEEVPEAS
116	PAEEGNDSEEVPEASGPQND
121	NDSEEVPEASGPQNDGKELC
126	VPEASGPQNDGKELCPPGKP
131	GPQNDGKELCPPGKPTTSEK
136	GKELCPPGKPTTSEKIHERS
141	PPGKPTTSEKIHERSGPKRG
146	TTSEKIHERSGPKRGEHAWT
151	IHERSGPKRGEHAWTHRLRE
156	GPKRGEHAWTHRLRERKQLV
161	EHAWTHRLRERKQLVIYEEI
166	HRLRERKQLVIYEEISDPEE
169	RERKQLVIYEEISDPEEDDE

## Sheet: 2d
Supplementary File 2d
gp100-derived overlapping peptides
Position	Peptide sequence
1	MDLVLKRCLLHLAVIGALLA
6	KRCLLHLAVIGALLAVGATK
11	HLAVIGALLAVGATKVPRNQ
16	GALLAVGATKVPRNQDWLGV
21	VGATKVPRNQDWLGVSRQLR
26	VPRNQDWLGVSRQLRTKAWN
31	DWLGVSRQLRTKAWNRQLYP
36	SRQLRTKAWNRQLYPEWTEA
41	TKAWNRQLYPEWTEAQRLDC
46	RQLYPEWTEAQRLDCWRGGQ
51	EWTEAQRLDCWRGGQVSLKV
56	QRLDCWRGGQVSLKVSNDGP
61	WRGGQVSLKVSNDGPTLIGA
66	VSLKVSNDGPTLIGANASFS
71	SNDGPTLIGANASFSIALNF
76	TLIGANASFSIALNFPGSQK
81	NASFSIALNFPGSQKVLPDG
86	IALNFPGSQKVLPDGQVIWV
91	PGSQKVLPDGQVIWVNNTII
96	VLPDGQVIWVNNTIINGSQV
101	QVIWVNNTIINGSQVWGGQP
106	NNTIINGSQVWGGQPVYPQE
111	NGSQVWGGQPVYPQETDDAC
116	WGGQPVYPQETDDACIFPDG
121	VYPQETDDACIFPDGGPCPS
126	TDDACIFPDGGPCPSGSWSQ
131	IFPDGGPCPSGSWSQKRSFV
136	GPCPSGSWSQKRSFVYVWKT
141	GSWSQKRSFVYVWKTWGQYW
146	KRSFVYVWKTWGQYWQVLGG
151	YVWKTWGQYWQVLGGPVSGL
156	WGQYWQVLGGPVSGLSIGTG
161	QVLGGPVSGLSIGTGRAMLG
166	PVSGLSIGTGRAMLGTHTME
171	SIGTGRAMLGTHTMEVTVYH
176	RAMLGTHTMEVTVYHRRGSR
181	THTMEVTVYHRRGSRSYVPL
186	VTVYHRRGSRSYVPLAHSSS
191	RRGSRSYVPLAHSSSAFTIT
196	SYVPLAHSSSAFTITDQVPF
201	AHSSSAFTITDQVPFSVSVS
206	AFTITDQVPFSVSVSQLRAL
211	DQVPFSVSVSQLRALDGGNK
216	SVSVSQLRALDGGNKHFLRN
221	QLRALDGGNKHFLRNQPLTF
226	DGGNKHFLRNQPLTFALQLH
231	HFLRNQPLTFALQLHDPSGY
236	QPLTFALQLHDPSGYLAEAD
241	ALQLHDPSGYLAEADLSYTW
246	DPSGYLAEADLSYTWDFGDS
251	LAEADLSYTWDFGDSSGTLI
256	LSYTWDFGDSSGTLISRALV
261	DFGDSSGTLISRALVVTHTY
266	SGTLISRALVVTHTYLEPGP
271	SRALVVTHTYLEPGPVTAQV
276	VTHTYLEPGPVTAQVVLQAA
281	LEPGPVTAQVVLQAAIPLTS
286	VTAQVVLQAAIPLTSCGSSP
291	VLQAAIPLTSCGSSPVPGTT
296	IPLTSCGSSPVPGTTDGHRP
301	CGSSPVPGTTDGHRPTAEAP
306	VPGTTDGHRPTAEAPNTTAG
311	DGHRPTAEAPNTTAGQVPTT
316	TAEAPNTTAGQVPTTEVVGT
321	NTTAGQVPTTEVVGTTPGQA
326	QVPTTEVVGTTPGQAPTAEP
331	EVVGTTPGQAPTAEPSGTTS
336	TPGQAPTAEPSGTTSVQVPT
341	PTAEPSGTTSVQVPTTEVIS
346	SGTTSVQVPTTEVISTAPVQ
351	VQVPTTEVISTAPVQMPTAE
356	TEVISTAPVQMPTAESTGMT
361	TAPVQMPTAESTGMTPEKVP
366	MPTAESTGMTPEKVPVSEVM
371	STGMTPEKVPVSEVMGTTLA
376	PEKVPVSEVMGTTLAEMSTP
381	VSEVMGTTLAEMSTPEATGM
386	GTTLAEMSTPEATGMTPAEV
391	EMSTPEATGMTPAEVSIVVL
396	EATGMTPAEVSIVVLSGTTA
401	TPAEVSIVVLSGTTAAQVTT
406	SIVVLSGTTAAQVTTTEWVE
411	SGTTAAQVTTTEWVETTARE
416	AQVTTTEWVETTARELPIPE
421	TEWVETTARELPIPEPEGPD
426	TTARELPIPEPEGPDASSIM
431	LPIPEPEGPDASSIMSTESI
436	PEGPDASSIMSTESITGSLG
441	ASSIMSTESITGSLGPLLDG
446	STESITGSLGPLLDGTATLR
451	TGSLGPLLDGTATLRLVKRQ
456	PLLDGTATLRLVKRQVPLDC
461	TATLRLVKRQVPLDCVLYRY
466	LVKRQVPLDCVLYRYGSFSV
471	VPLDCVLYRYGSFSVTLDIV
476	VLYRYGSFSVTLDIVQGIES
481	GSFSVTLDIVQGIESAEILQ
486	TLDIVQGIESAEILQAVPSG
491	QGIESAEILQAVPSGEGDAF
496	AEILQAVPSGEGDAFELTVS
501	AVPSGEGDAFELTVSCQGGL
506	EGDAFELTVSCQGGLPKEAC
511	ELTVSCQGGLPKEACMEISS
516	CQGGLPKEACMEISSPGCQP
521	PKEACMEISSPGCQPPAQRL
526	MEISSPGCQPPAQRLCQPVL
531	PGCQPPAQRLCQPVLPSPAC
536	PAQRLCQPVLPSPACQLVLH
541	CQPVLPSPACQLVLHQILKG
546	PSPACQLVLHQILKGGSGTY
551	QLVLHQILKGGSGTYCLNVS
556	QILKGGSGTYCLNVSLADTN
561	GSGTYCLNVSLADTNSLAVV
566	CLNVSLADTNSLAVVSTQLI
571	LADTNSLAVVSTQLIMPGQE
576	SLAVVSTQLIMPGQEAGLGQ
581	STQLIMPGQEAGLGQVPLIV
586	MPGQEAGLGQVPLIVGILLV
591	AGLGQVPLIVGILLVLMAVV
596	VPLIVGILLVLMAVVLASLI
601	GILLVLMAVVLASLIYRRRL
606	LMAVVLASLIYRRRLMKQDF
611	LASLIYRRRLMKQDFSVPQL
616	YRRRLMKQDFSVPQLPHSSS
621	MKQDFSVPQLPHSSSHWLRL
626	SVPQLPHSSSHWLRLPRIFC
631	PHSSSHWLRLPRIFCSCPIG
636	HWLRLPRIFCSCPIGENSPL
641	PRIFCSCPIGENSPLLSGQQ
642	RIFCSCPIGENSPLLSGQQV

## Sheet: 2e
Supplementary File 2e
MAGE-A1-derived overlapping peptides
Position	Peptide sequence
1	MSLEQRSLHCKPEEALEAQQ
6	RSLHCKPEEALEAQQEALGL
11	KPEEALEAQQEALGLVCVQA
16	LEAQQEALGLVCVQAATSSS
21	EALGLVCVQAATSSSSPLVL
26	VCVQAATSSSSPLVLGTLEE
31	ATSSSSPLVLGTLEEVPTAG
36	SPLVLGTLEEVPTAGSTDPP
41	GTLEEVPTAGSTDPPQSPQG
46	VPTAGSTDPPQSPQGASAFP
51	STDPPQSPQGASAFPTTINF
56	QSPQGASAFPTTINFTRQRQ
61	ASAFPTTINFTRQRQPSEGS
66	TTINFTRQRQPSEGSSSREE
71	TRQRQPSEGSSSREEEGPST
76	PSEGSSSREEEGPSTSCILE
81	SSREEEGPSTSCILESLFRA
86	EGPSTSCILESLFRAVITKK
91	SCILESLFRAVITKKVADLV
96	SLFRAVITKKVADLVGFLLL
101	VITKKVADLVGFLLLKYRAR
106	VADLVGFLLLKYRAREPVTK
111	GFLLLKYRAREPVTKAEMLE
116	KYRAREPVTKAEMLESVIKN
121	EPVTKAEMLESVIKNYKHCF
126	AEMLESVIKNYKHCFPEIFG
131	SVIKNYKHCFPEIFGKASES
136	YKHCFPEIFGKASESLQLVF
141	PEIFGKASESLQLVFGIDVK
146	KASESLQLVFGIDVKEADPT
151	LQLVFGIDVKEADPTGHSYV
156	GIDVKEADPTGHSYVLVTCL
161	EADPTGHSYVLVTCLGLSYD
166	GHSYVLVTCLGLSYDGLLGD
171	LVTCLGLSYDGLLGDNQIMP
176	GLSYDGLLGDNQIMPKTGFL
181	GLLGDNQIMPKTGFLIIVLV
186	NQIMPKTGFLIIVLVMIAME
191	KTGFLIIVLVMIAMEGGHAP
196	IIVLVMIAMEGGHAPEEEIW
201	MIAMEGGHAPEEEIWEELSV
206	GGHAPEEEIWEELSVMEVYD
211	EEEIWEELSVMEVYDGREHS
216	EELSVMEVYDGREHSAYGEP
221	MEVYDGREHSAYGEPRKLLT
226	GREHSAYGEPRKLLTQDLVQ
231	AYGEPRKLLTQDLVQEKYLE
236	RKLLTQDLVQEKYLEYRQVP
241	QDLVQEKYLEYRQVPDSDPA
246	EKYLEYRQVPDSDPARYEFL
251	YRQVPDSDPARYEFLWGPRA
256	DSDPARYEFLWGPRALAETS
261	RYEFLWGPRALAETSYVKVL
266	WGPRALAETSYVKVLEYVIK
271	LAETSYVKVLEYVIKVSARV
276	YVKVLEYVIKVSARVRFFFP
281	EYVIKVSARVRFFFPSLREA
286	VSARVRFFFPSLREAALREE
290	VRFFFPSLREAALREEEEGV

## Sheet: 2f
Supplementary File 2f
Survivin-derived overlapping peptides
Position	Peptide sequence
1	MGAPTLPPAWQPFLKDHRIS
6	LPPAWQPFLKDHRISTFKNW
11	QPFLKDHRISTFKNWPFLEG
16	DHRISTFKNWPFLEGCACTP
21	TFKNWPFLEGCACTPERMAE
26	PFLEGCACTPERMAEAGFIH
31	CACTPERMAEAGFIHCPTEN
36	ERMAEAGFIHCPTENEPDLA
41	AGFIHCPTENEPDLAQCFFC
46	CPTENEPDLAQCFFCFKELE
51	EPDLAQCFFCFKELEGWEPD
56	QCFFCFKELEGWEPDDDPIE
61	FKELEGWEPDDDPIEEHKKH
66	GWEPDDDPIEEHKKHSSGCA
71	DDPIEEHKKHSSGCAFLSVK
76	EHKKHSSGCAFLSVKKQFEE
81	SSGCAFLSVKKQFEELTLGE
86	FLSVKKQFEELTLGEFLKLD
91	KQFEELTLGEFLKLDRERAK
96	LTLGEFLKLDRERAKNKIAK
101	FLKLDRERAKNKIAKETNNK
106	RERAKNKIAKETNNKKKEFE
111	NKIAKETNNKKKEFEETAKK
116	ETNNKKKEFEETAKKVRRAI
121	KKEFEETAKKVRRAIEQLAA
123	EFEETAKKVRRAIEQLAAMD
