# Supplementary material for: Landscape mapping of shared antigenic epitopes and their cognate TCRs of tumor-infiltrating T lymphocytes in melanoma
Source: eLife journal article supplement (doi:10.7554/elife.53244), 2020-04-20
Supplement: supp [file elife-53244-supp-v1.zip › elife_poa_e53244_Supplementary_file_4.xlsx]

## Sheet: Sheet1
Supplementary File 4
Twenty-five class I alleles for which paired multimers and artificial APCs were generated
HLA-A	HLA-B	HLA-C
01:01	07:02	02:02
02:01	08:01	03:04
03:01	14:02	05:01
24:02	18:01	06:02
30:02	27:05	07:01
32:01	40:01	07:02
	44:02	8:02
	45:01	08:03
	48:01	15:02
	51:01
