# Supplementary figures and images for: Landscape mapping of shared antigenic epitopes and their cognate TCRs of tumor-infiltrating T lymphocytes in melanoma
Source: eLife journal article supplement (doi:10.7554/elife.53244), 2020-04-20

Figure 2-figure supplement 1

**A**

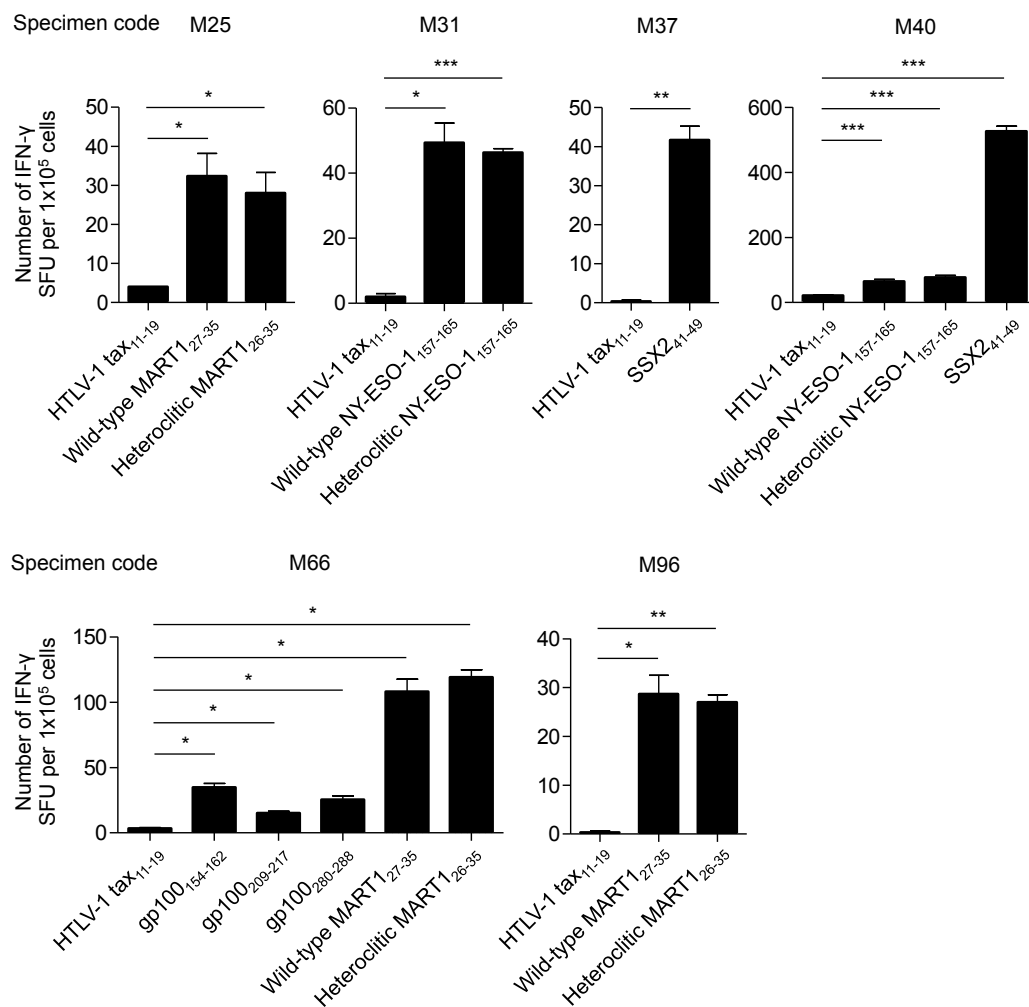

**B**

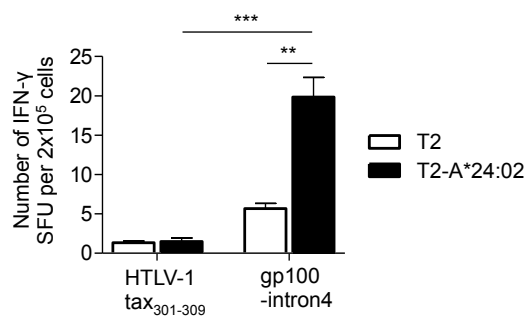

**C**

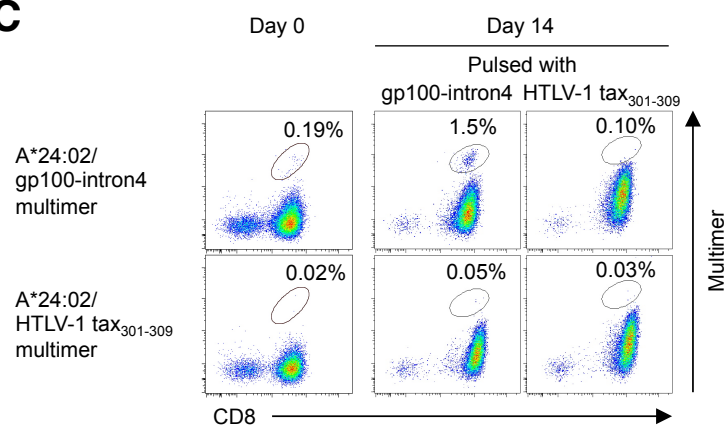

**D**

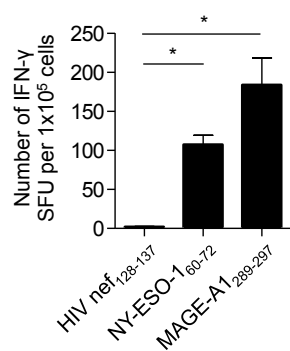

Supplement: supp [file elife-53244-supp-v1.zip › elife_poa_e53244_Figure_2_figure_supplement_1.pdf]

Figure 5-figure supplement 1

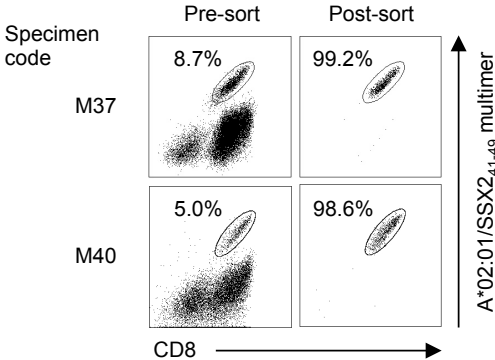

Supplement: supp [file elife-53244-supp-v1.zip › elife_poa_e53244_Figure_5_figure_supplement_1.pdf]

Figure 5-figure supplement 3

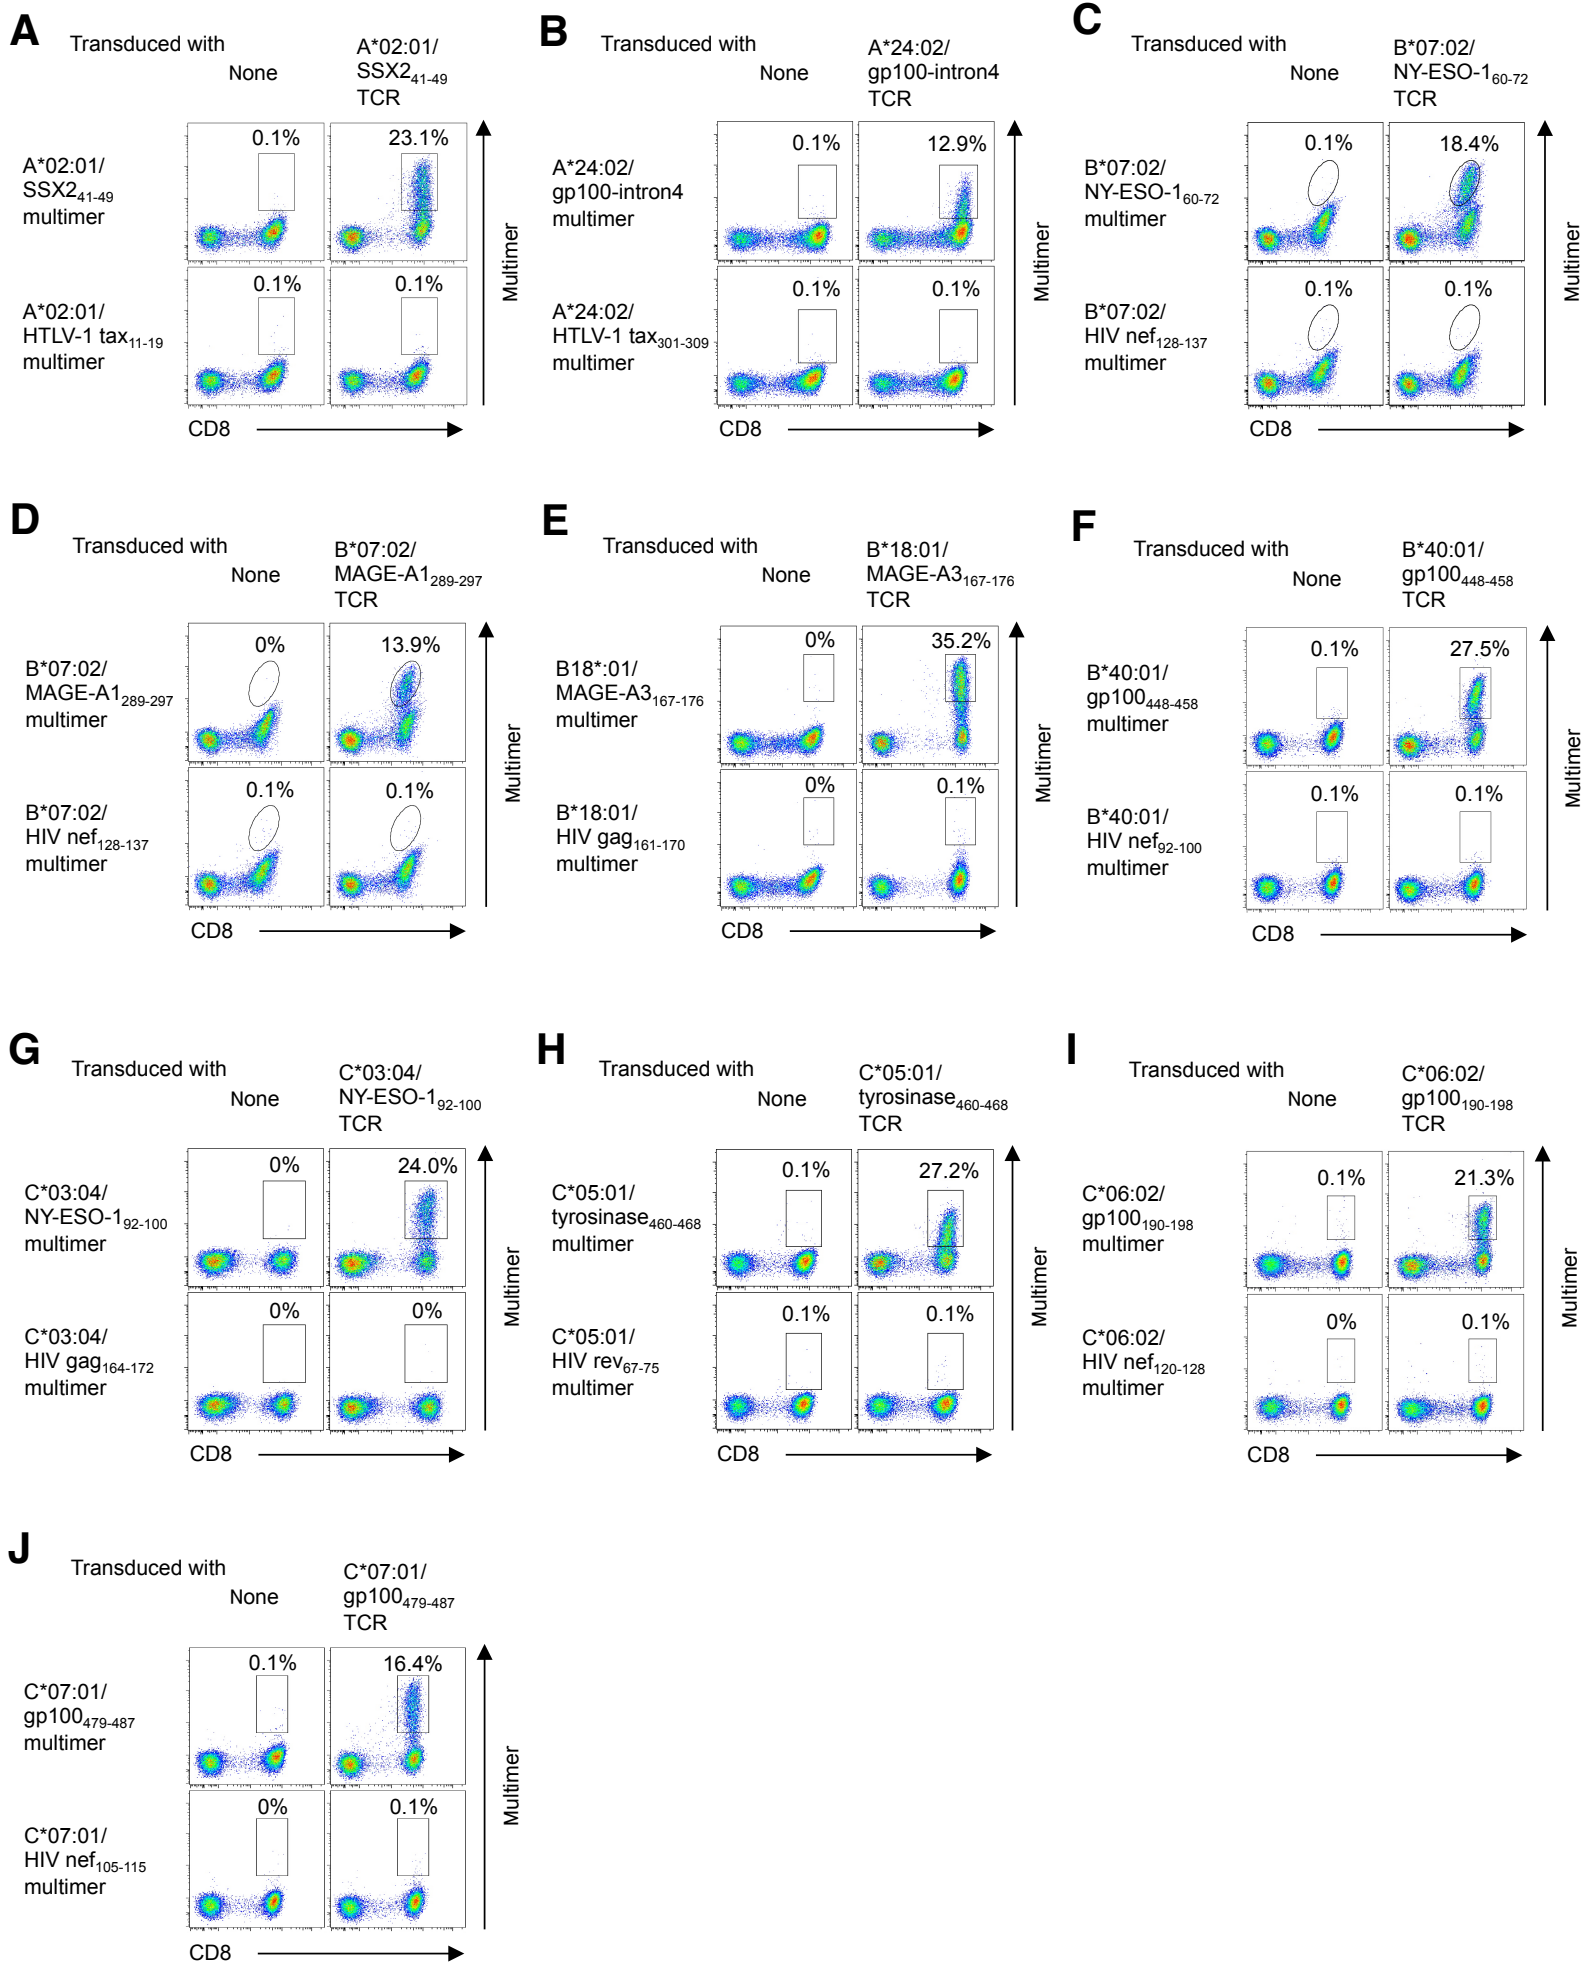

Supplement: supp [file elife-53244-supp-v1.zip › elife_poa_e53244_Figure_5_figure_supplement_3.pdf]

**Figure 1-figure supplement 1**

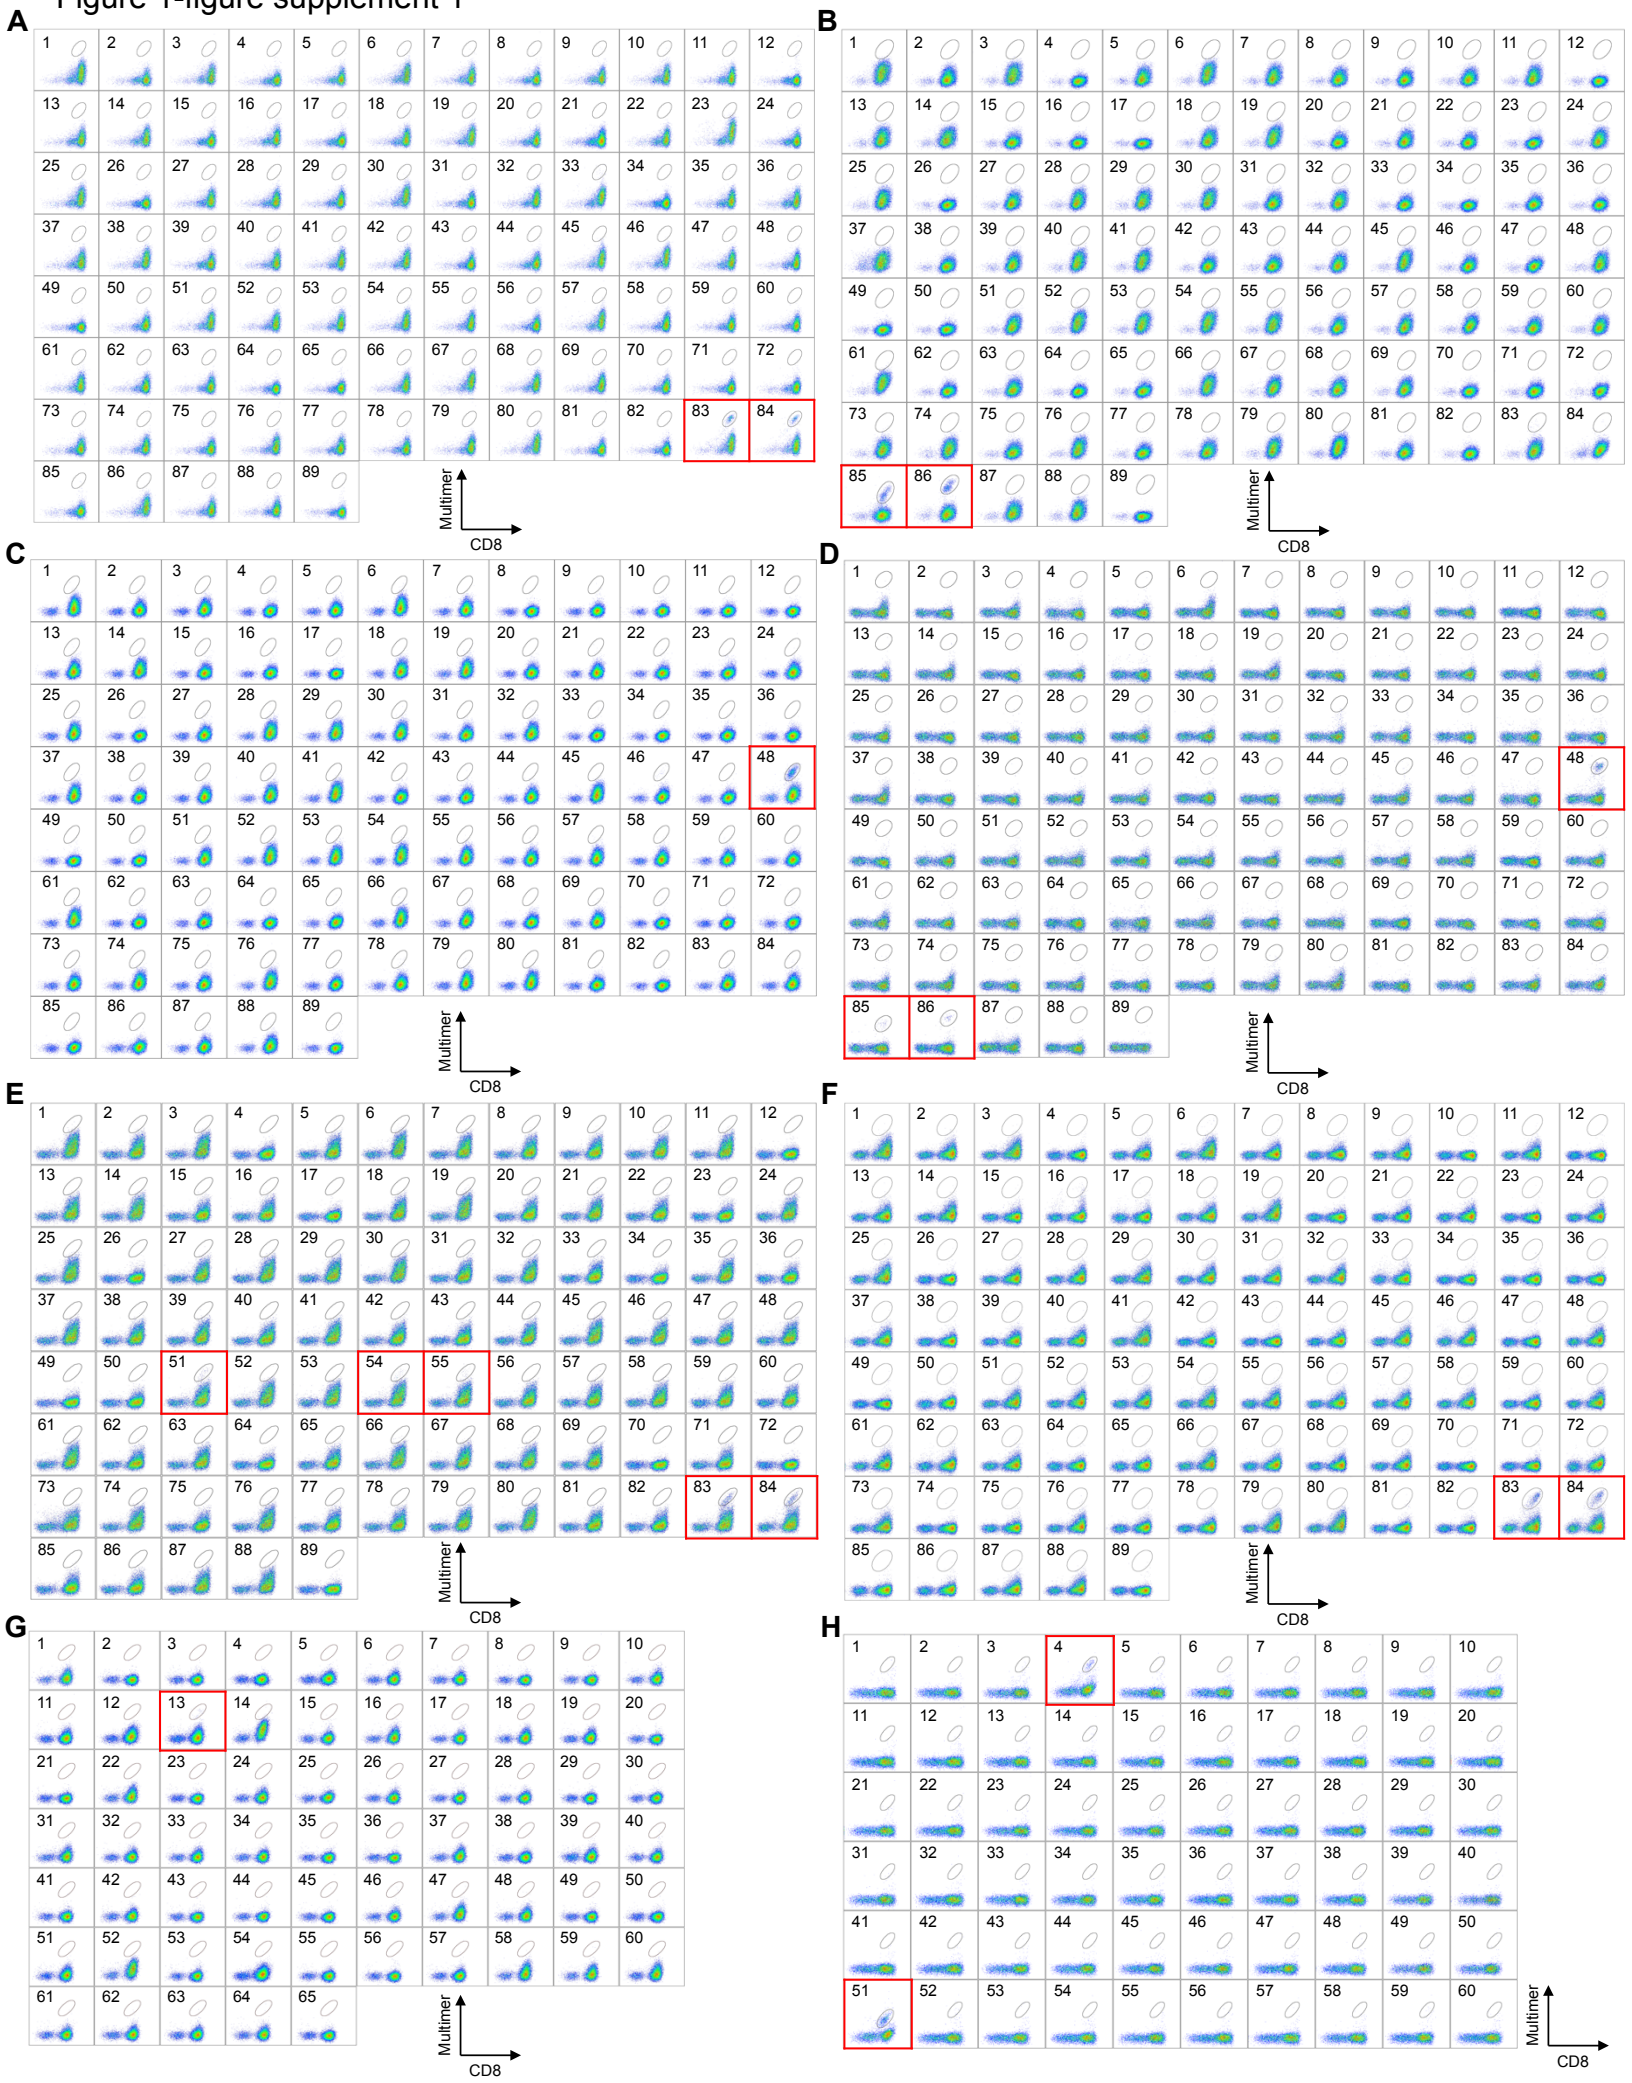

Supplement: supp [file elife-53244-supp-v1.zip › elife_poa_e53244_Figure_1_figure_supplement_1.pdf]

Figure 5-figure supplement 5

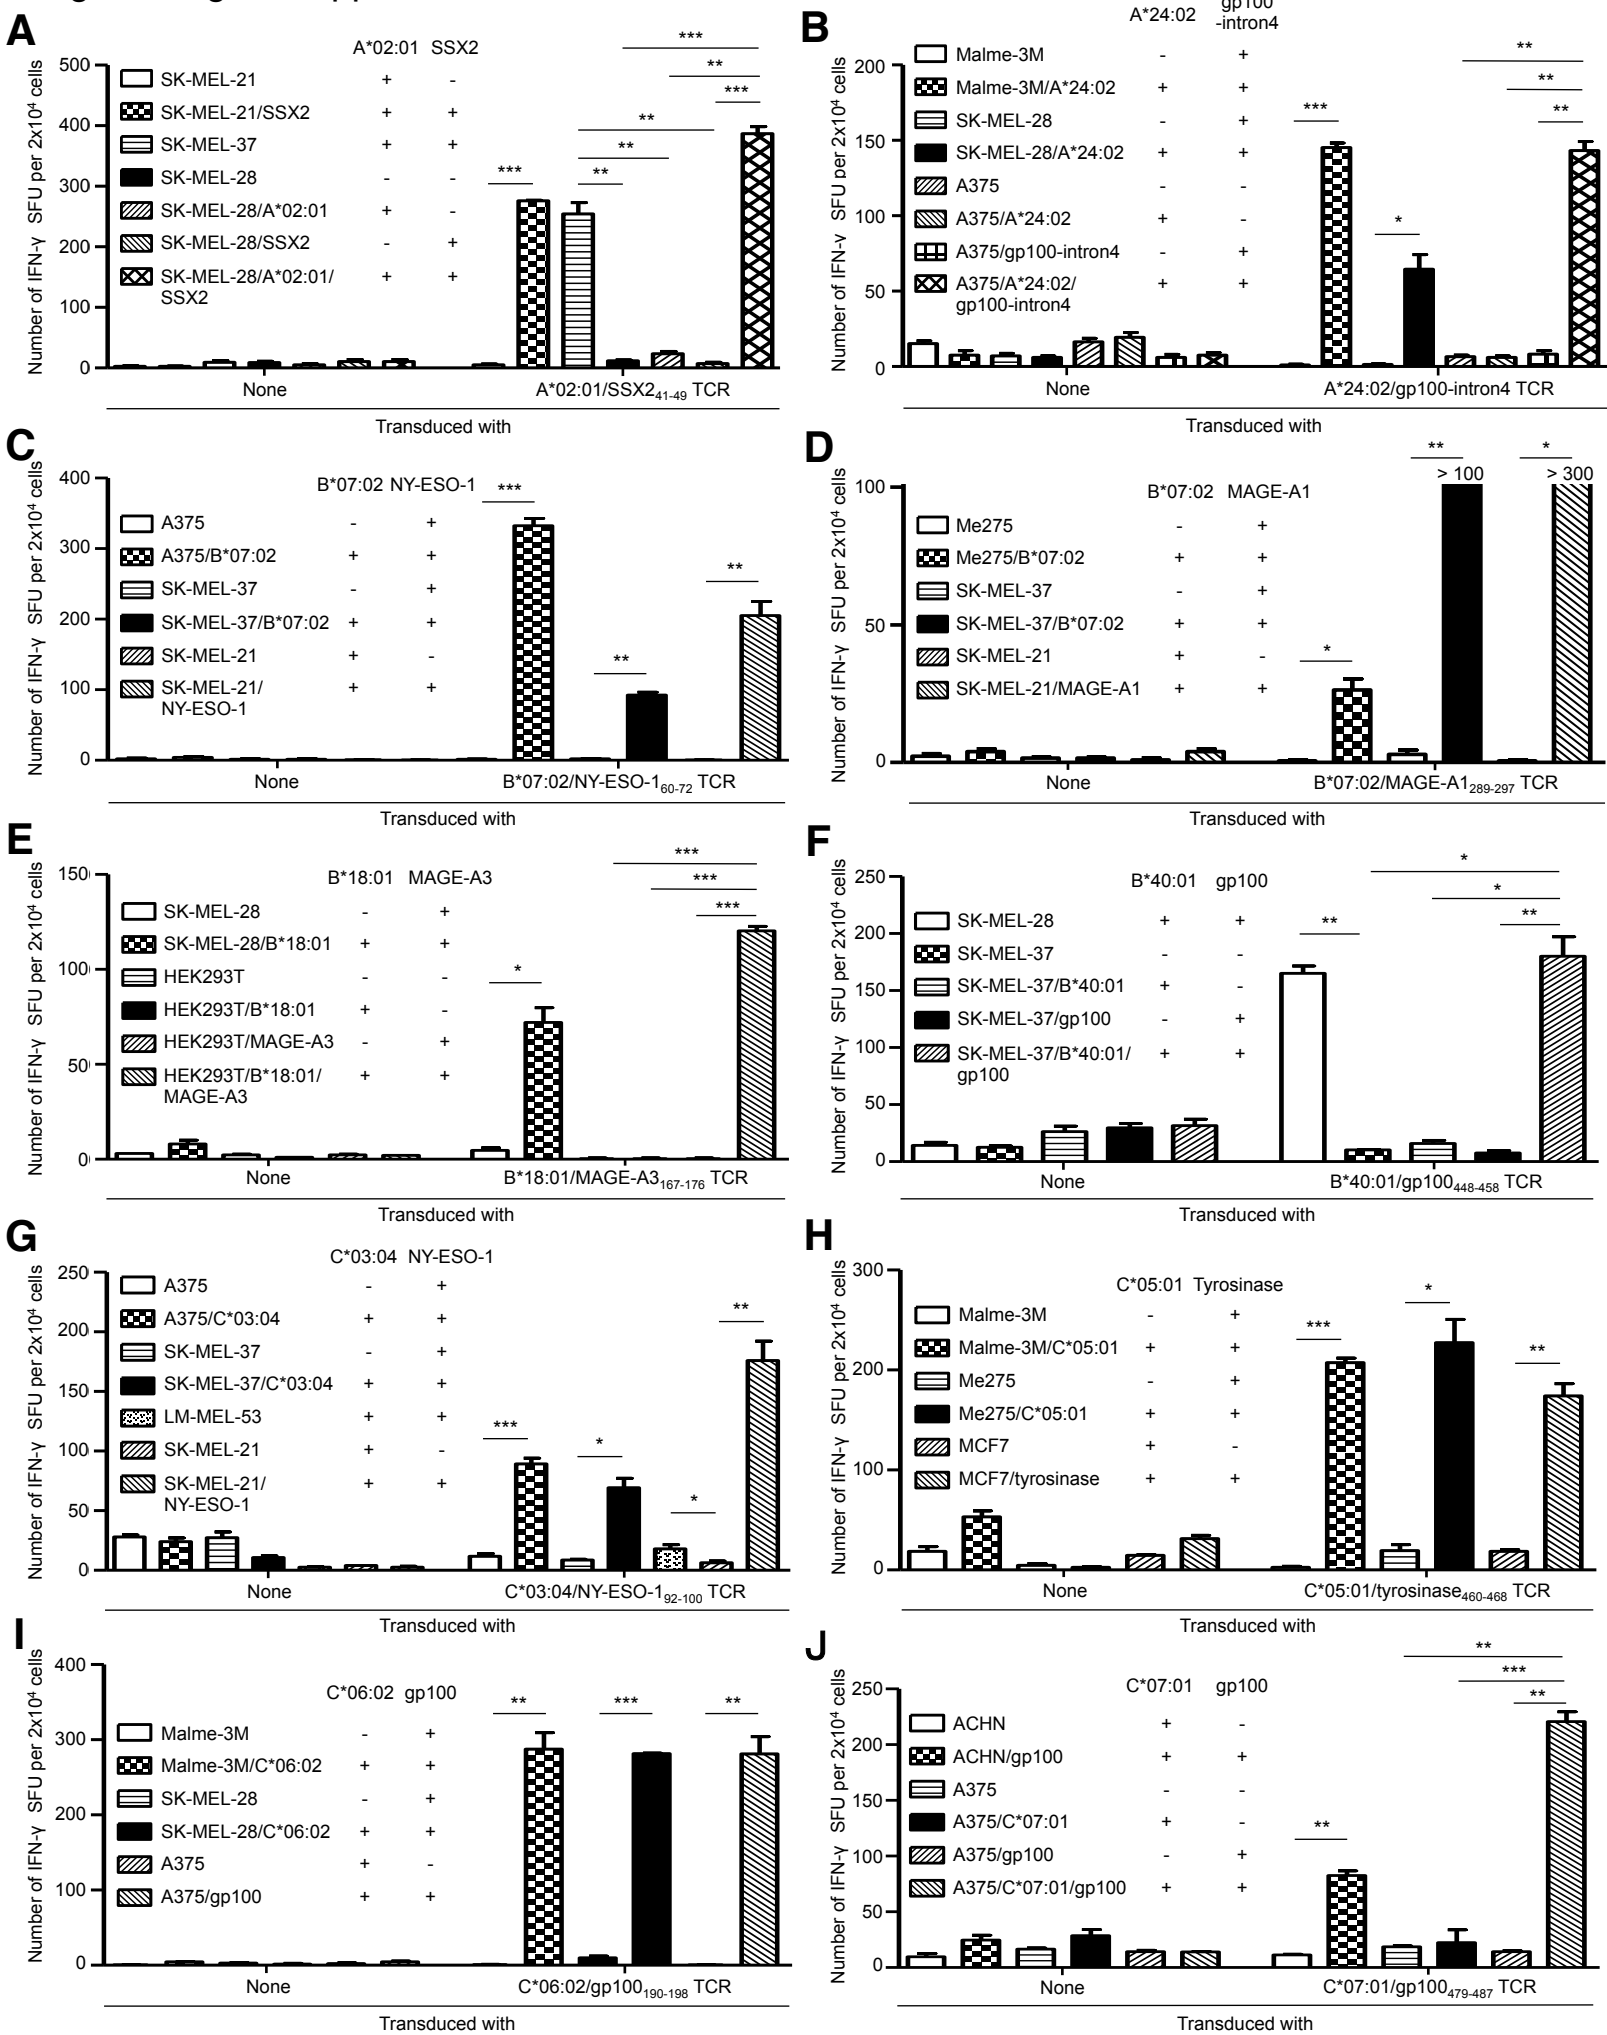

Supplement: supp [file elife-53244-supp-v1.zip › elife_poa_e53244_Figure_5_figure_supplement_5.pdf]

Figure 6-figure supplement 2

**A**

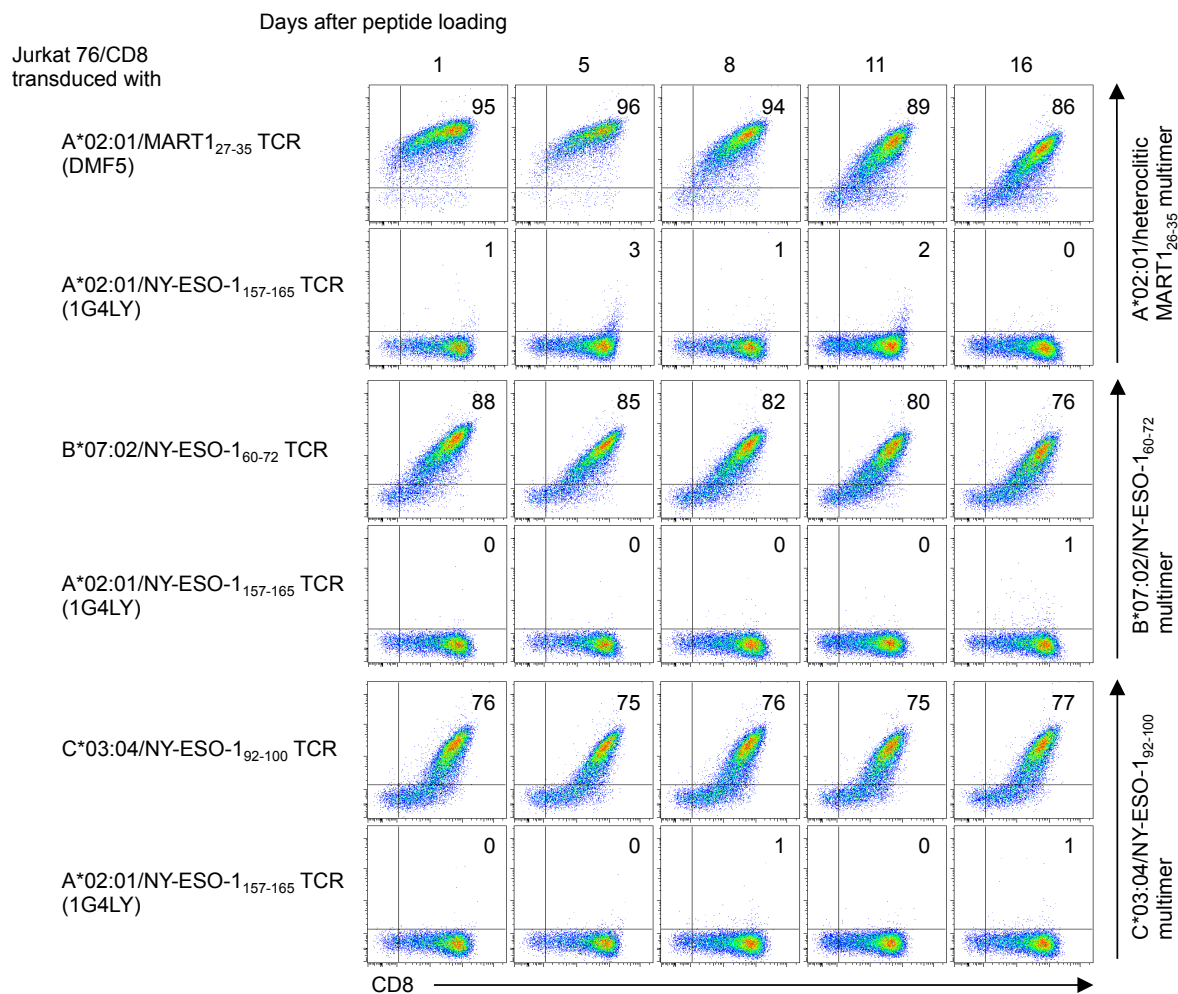

**B**

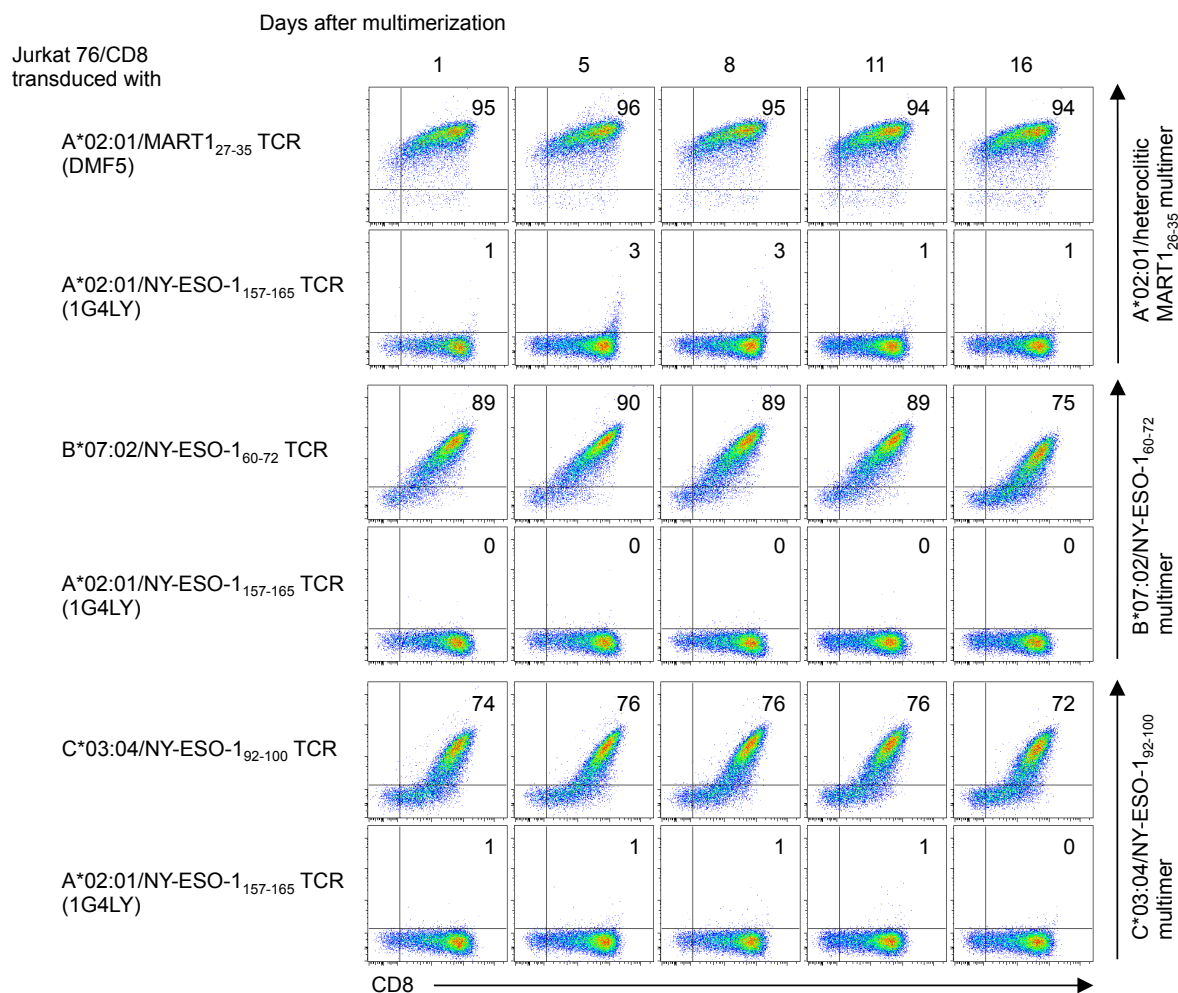

Supplement: supp [file elife-53244-supp-v1.zip › elife_poa_e53244_Figure_6_figure_supplement_2.pdf]

Figure 5-figure supplement 6

**A**

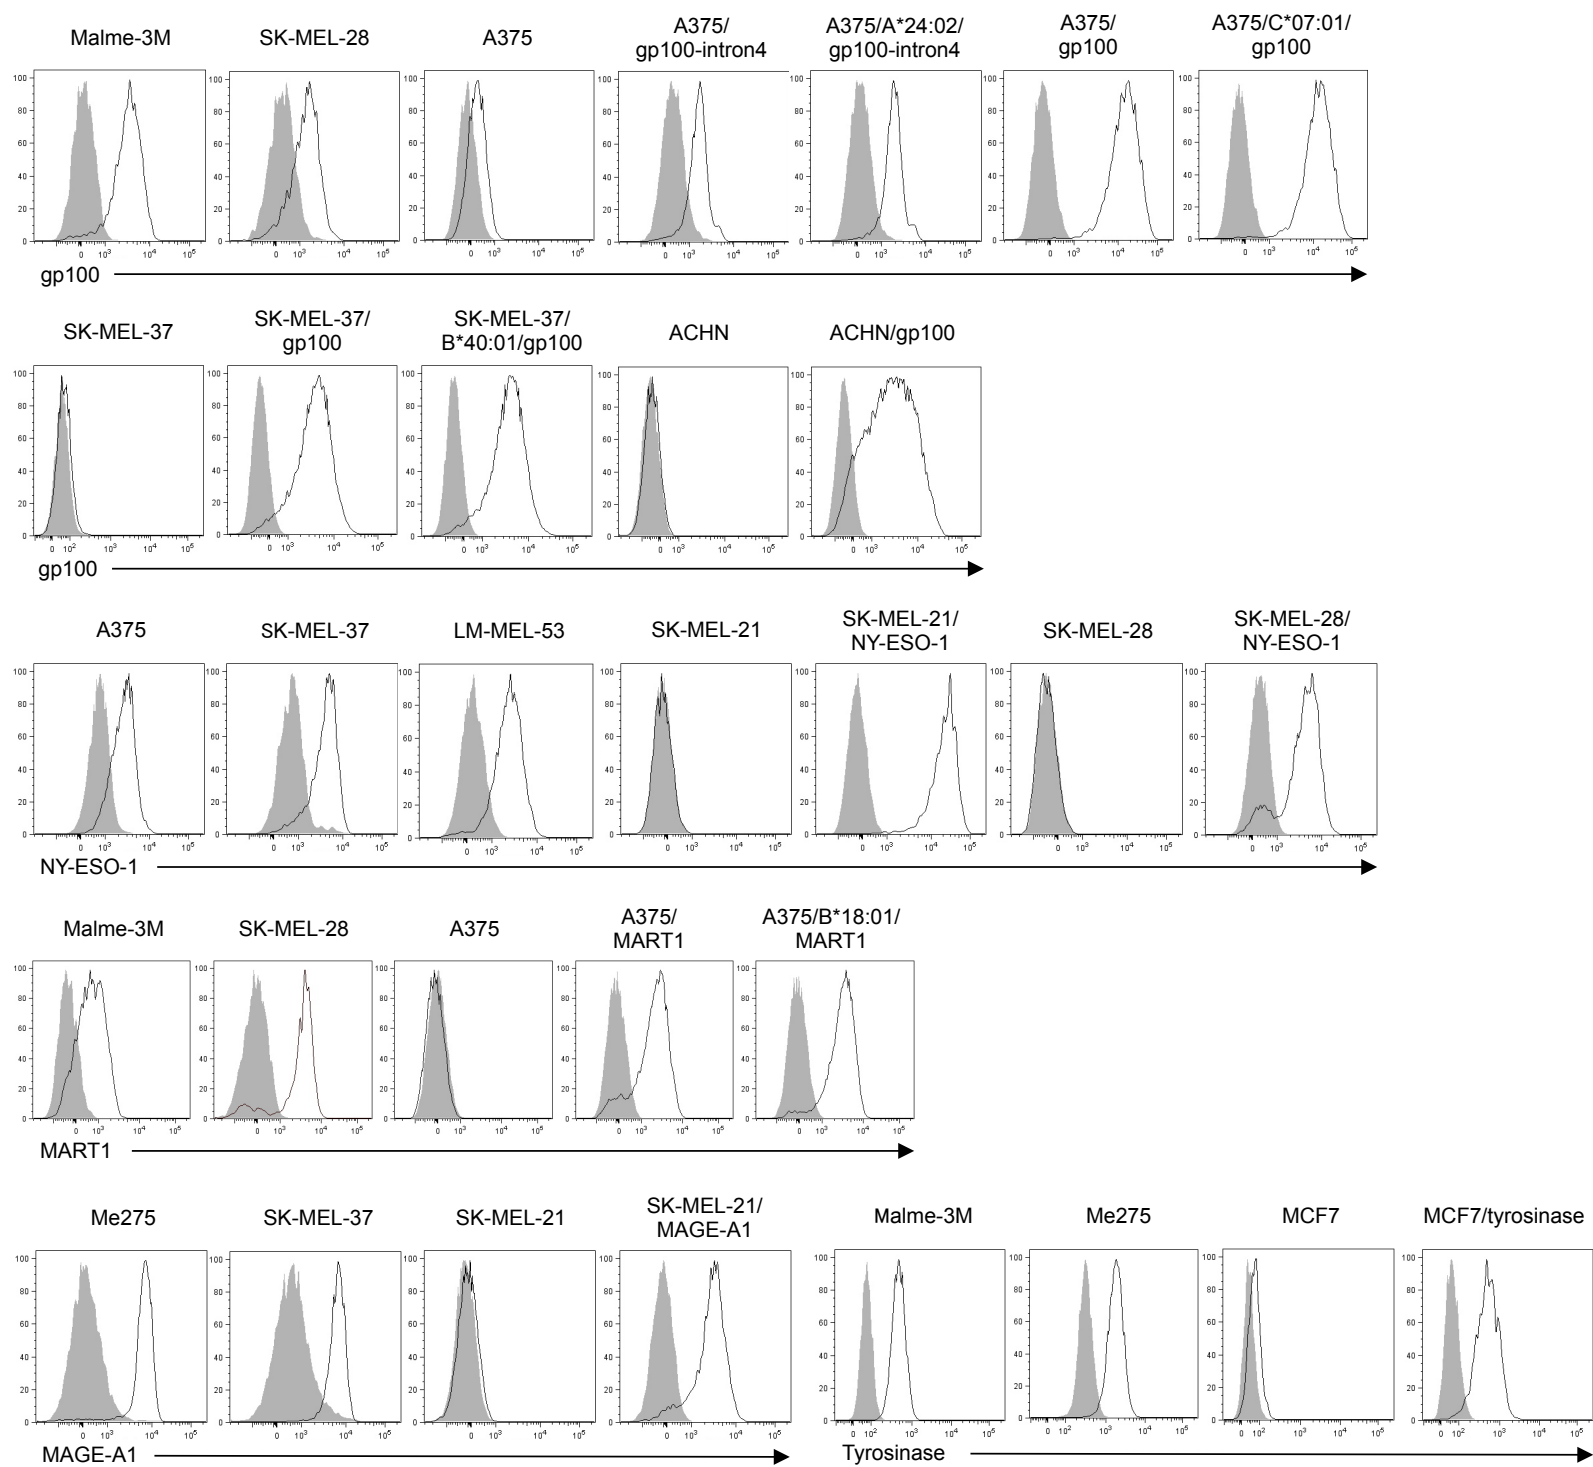

**B**

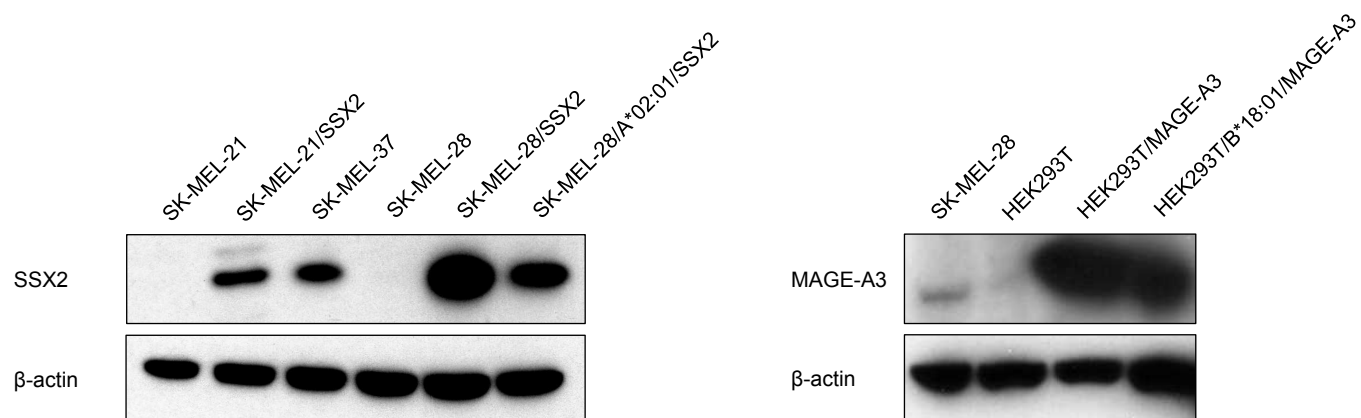

Supplement: supp [file elife-53244-supp-v1.zip › elife_poa_e53244_Figure_5_figure_supplement_6.pdf]

Figure 4-figure supplement 1

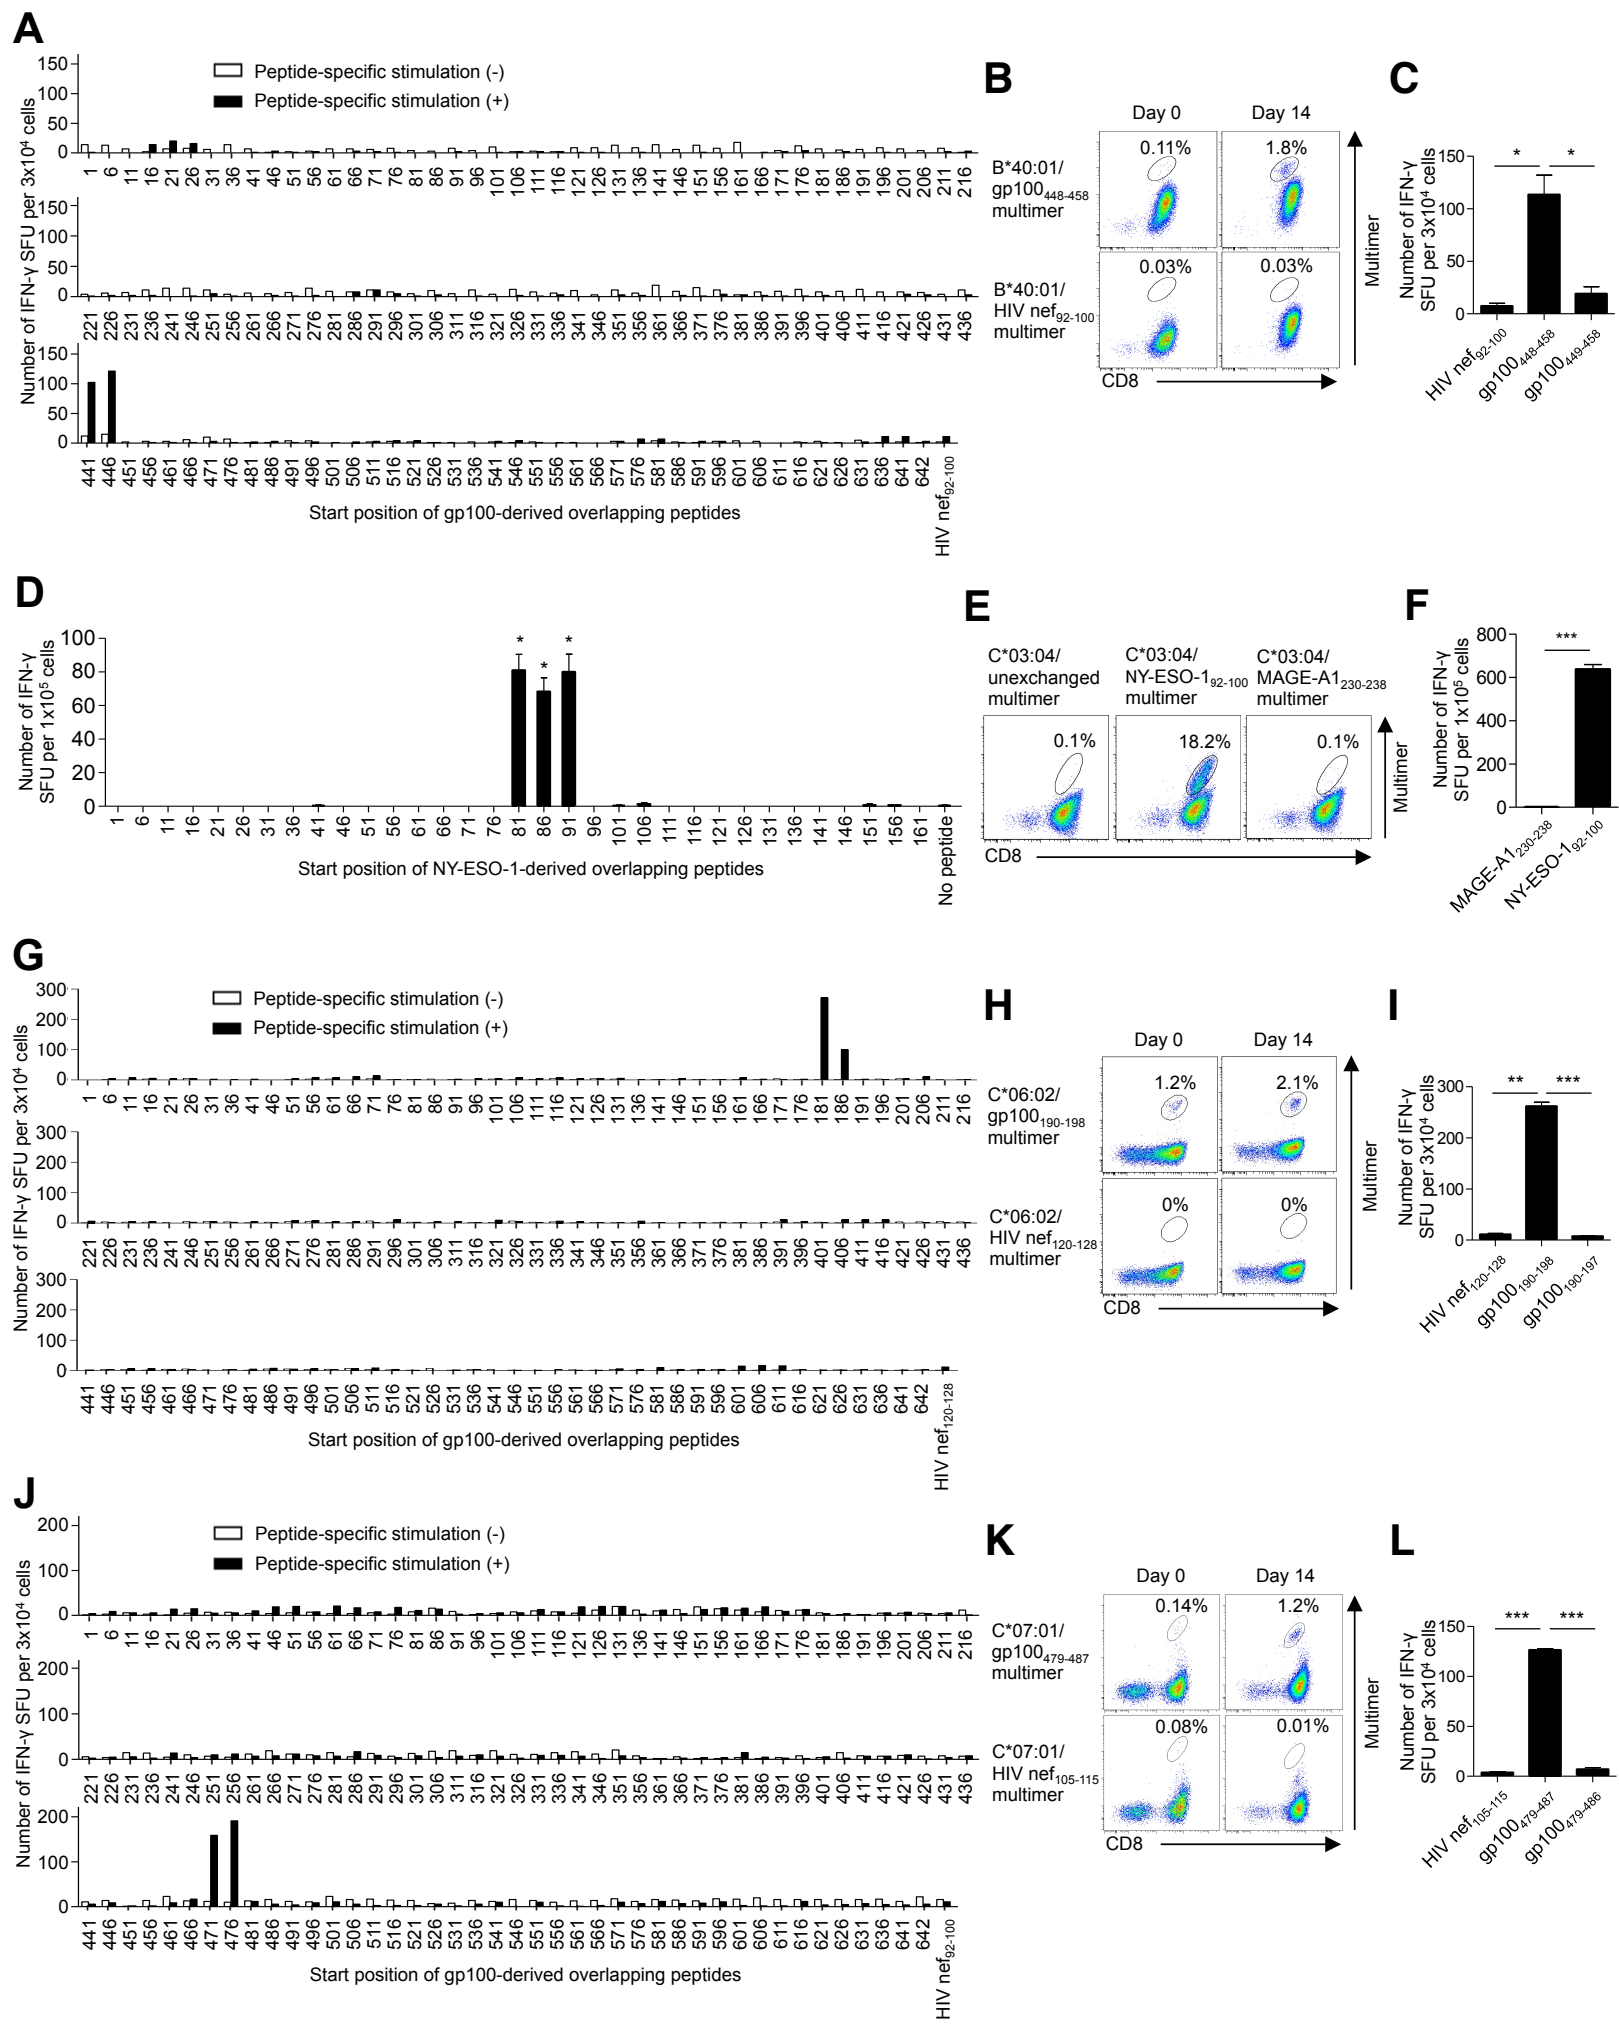

Supplement: supp [file elife-53244-supp-v1.zip › elife_poa_e53244_Figure_4_figure_supplement_1.pdf]

Figure 5-figure supplement 7

**A**

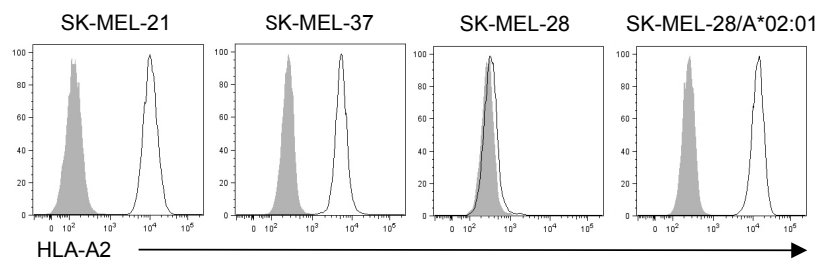

**B**

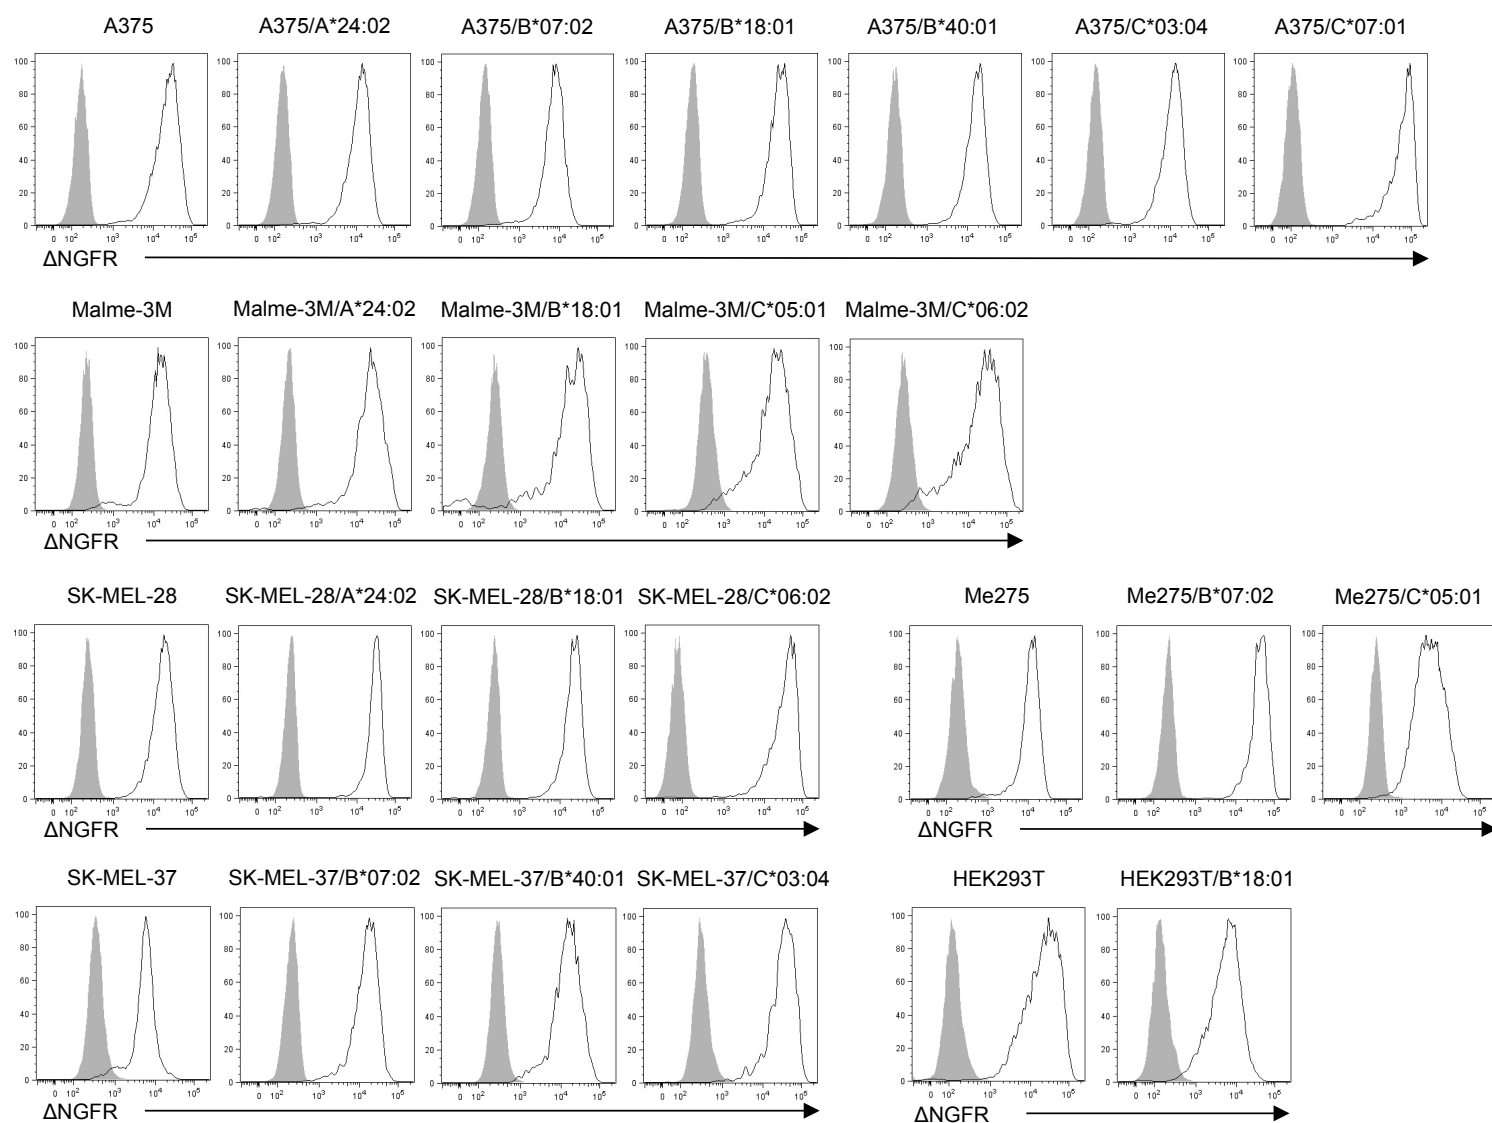

Supplement: supp [file elife-53244-supp-v1.zip › elife_poa_e53244_Figure_5_figure_supplement_7.pdf]

Figure 6-figure supplement 3

**A**

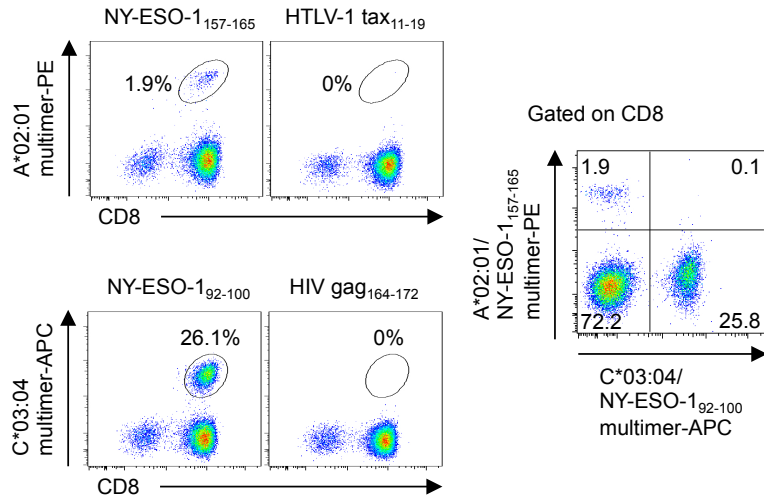

**B**

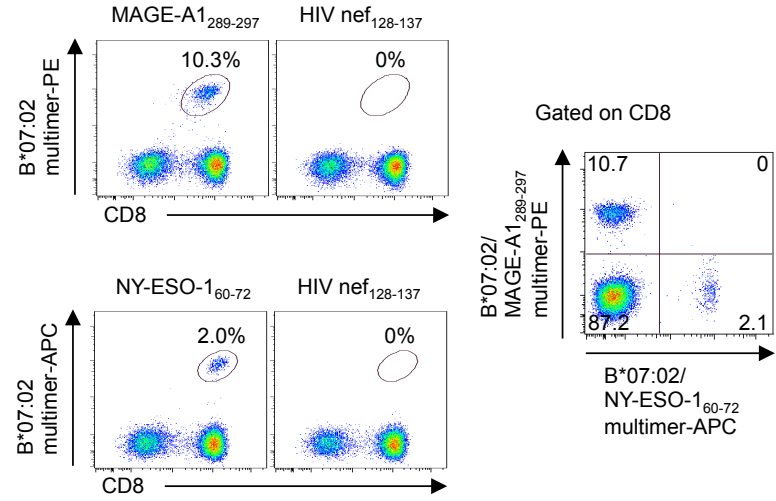

**C**

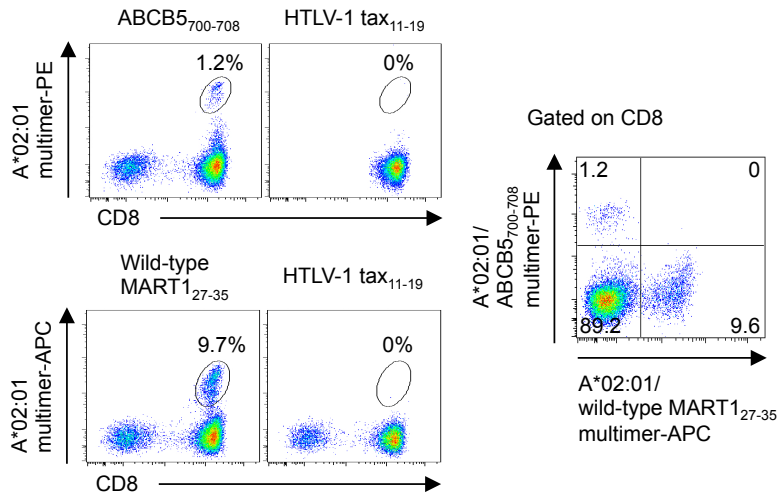

**D**

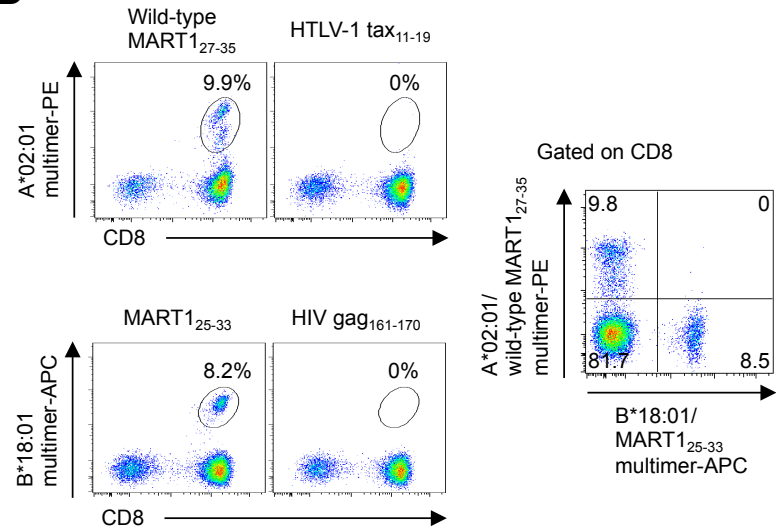

Supplement: supp [file elife-53244-supp-v1.zip › elife_poa_e53244_Figure_6_figure_supplement_3.pdf]

Figure 6-figure supplement 1

**A**

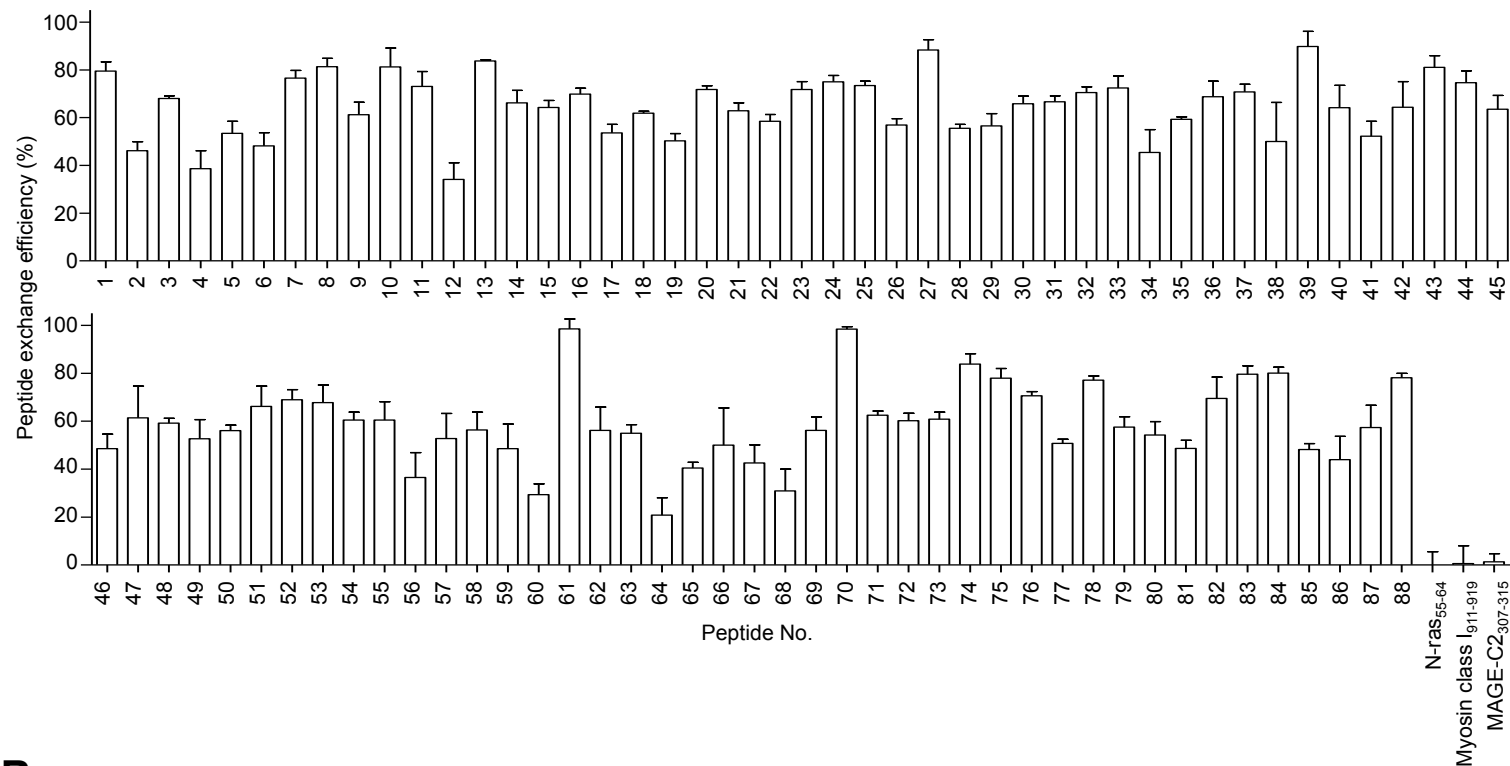

**B**

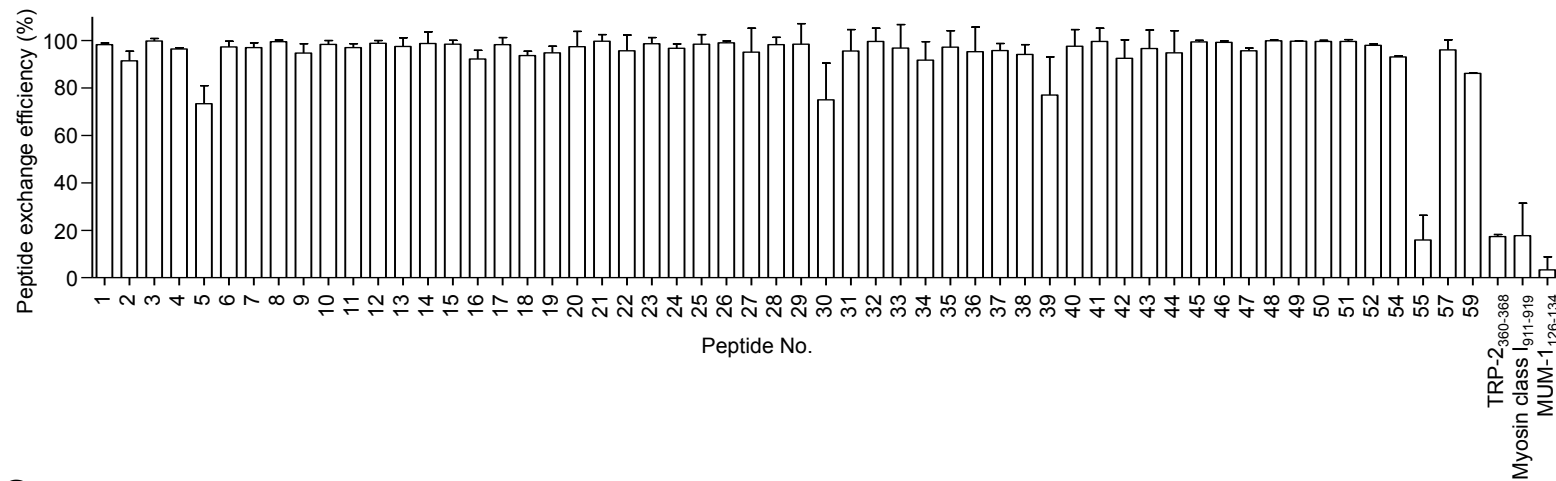

**C**

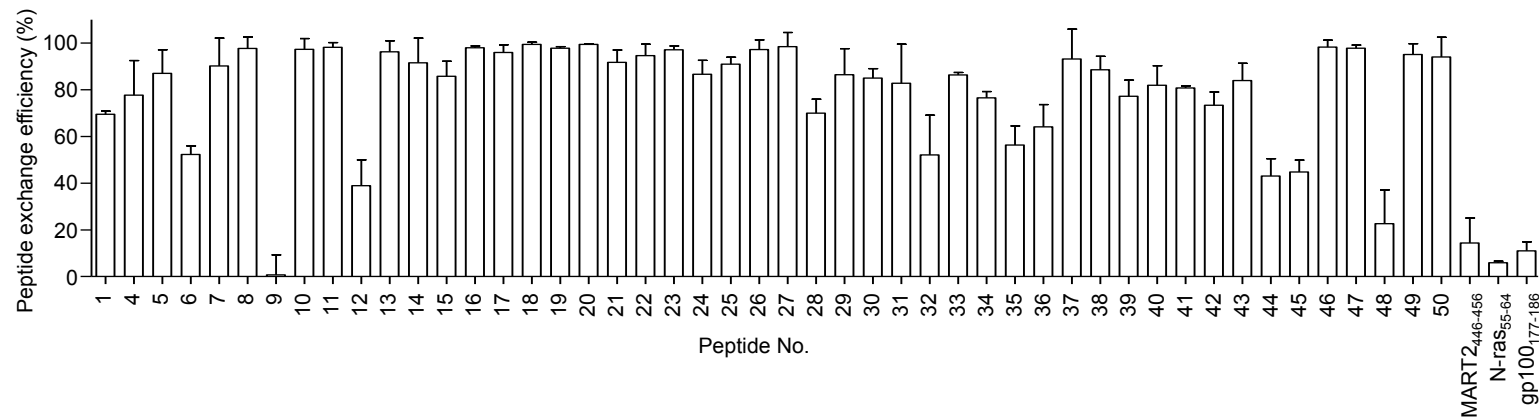

Supplement: supp [file elife-53244-supp-v1.zip › elife_poa_e53244_Figure_6_figure_supplement_1.pdf]

# Figure 5-figure supplement 2

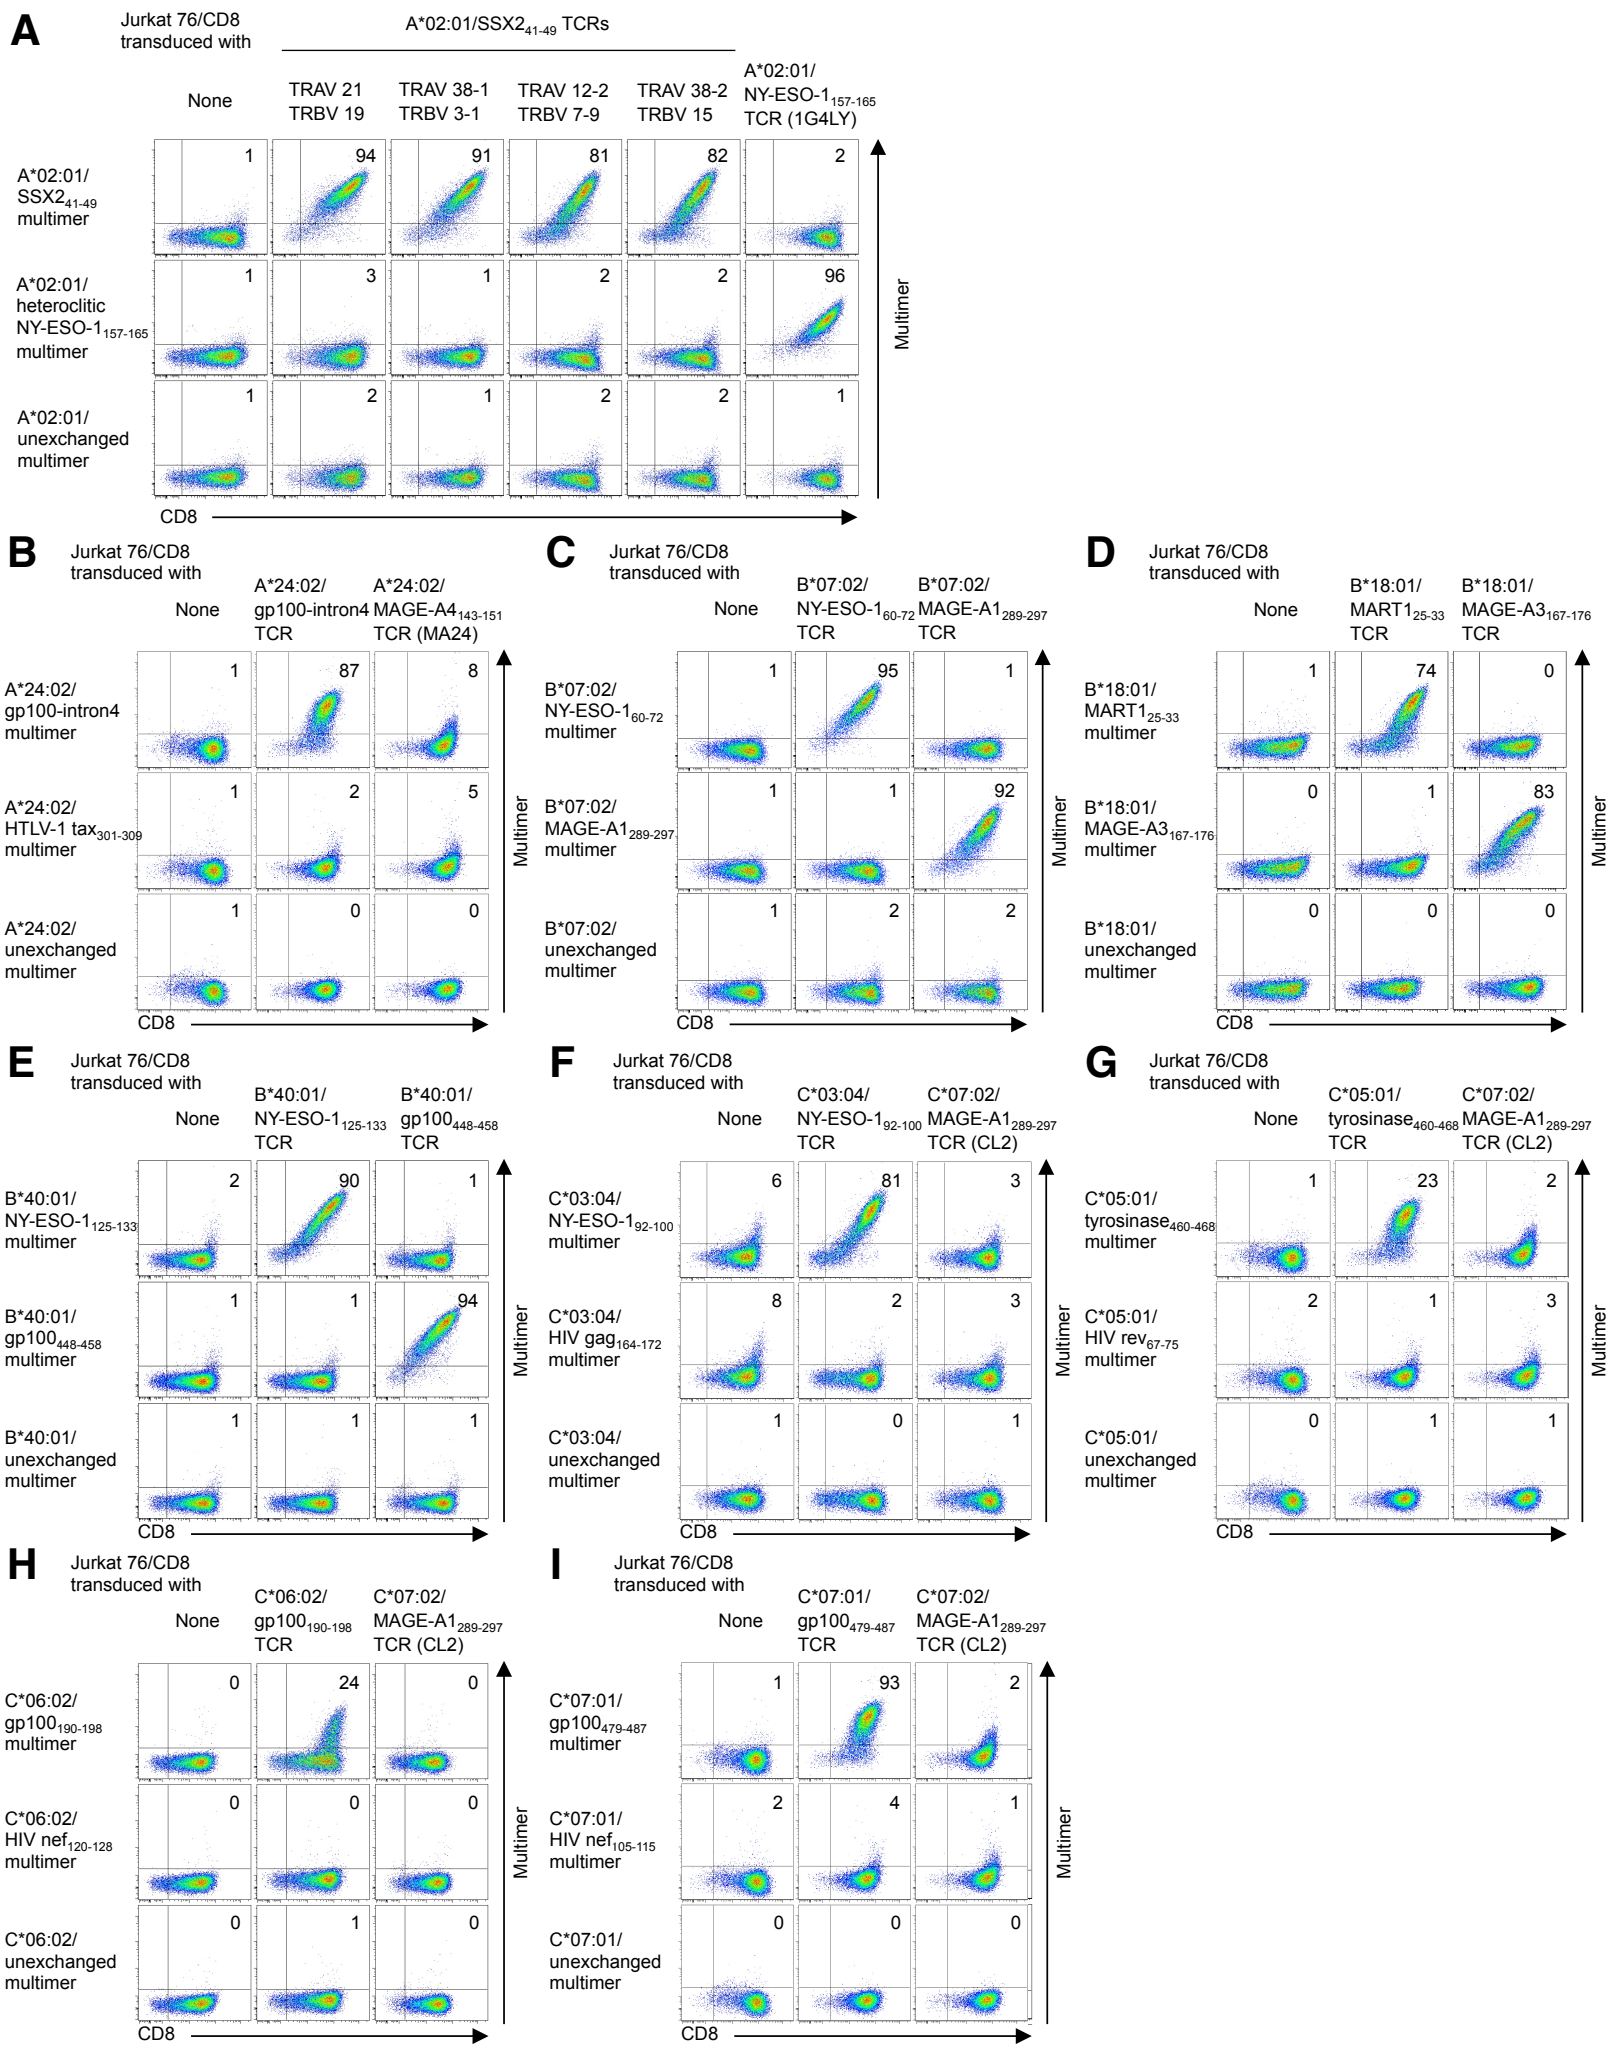

Supplement: supp [file elife-53244-supp-v1.zip › elife_poa_e53244_Figure_5_figure_supplement_2.pdf]

Figure 5-figure supplement 4

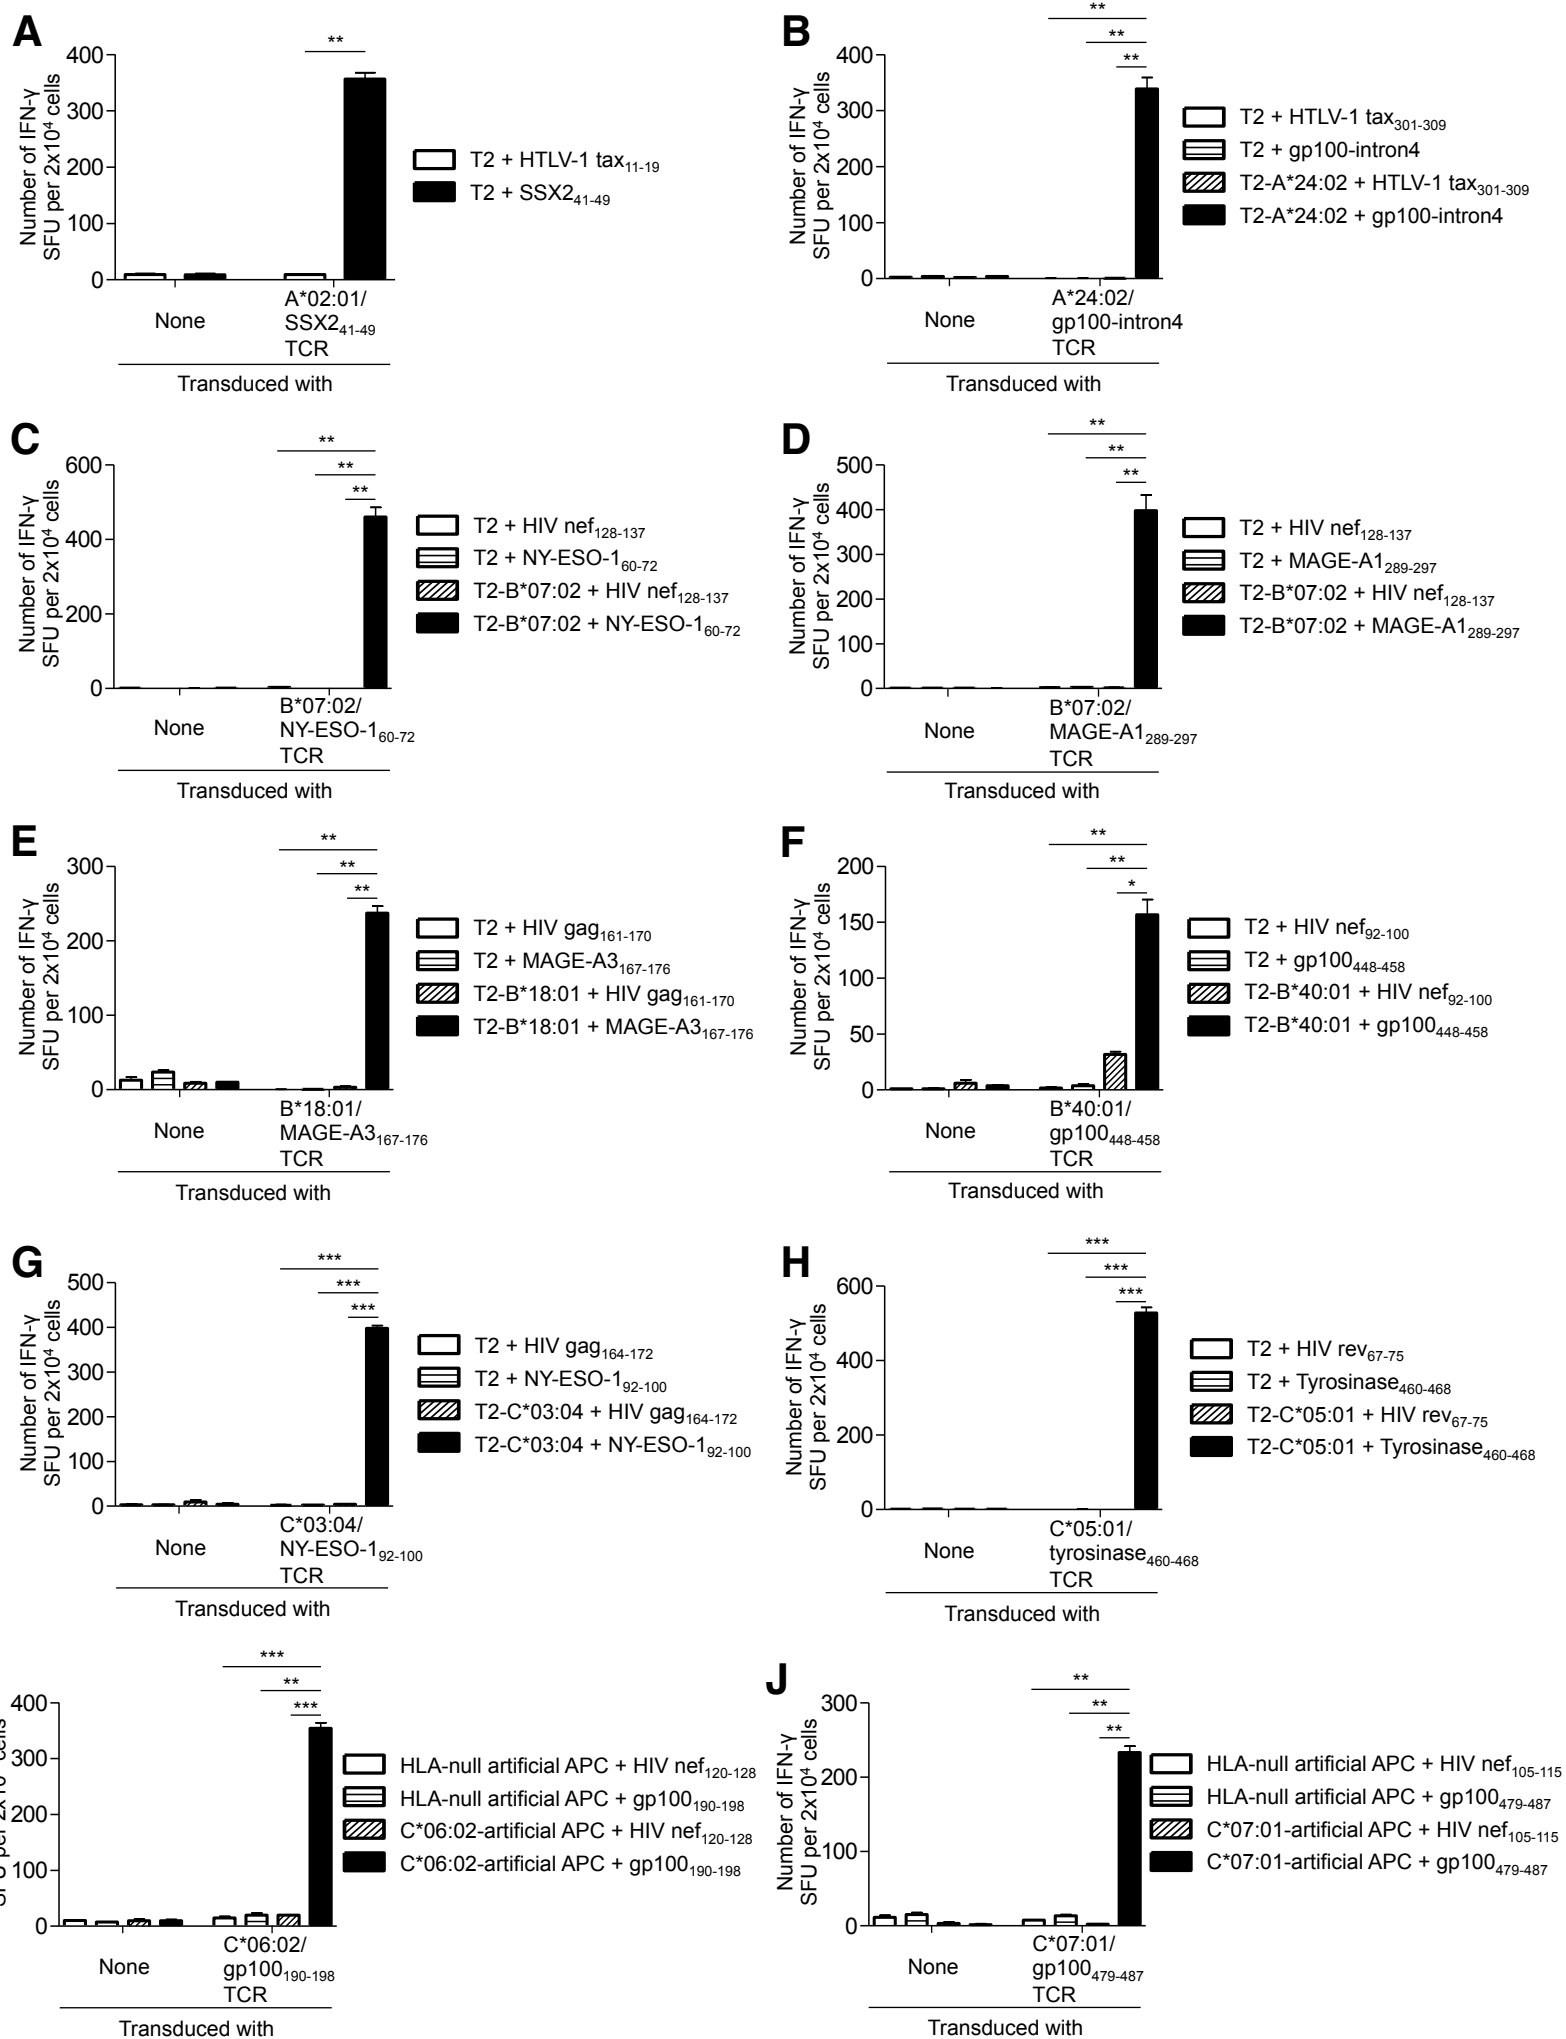

Supplement: supp [file elife-53244-supp-v1.zip › elife_poa_e53244_Figure_5_figure_supplement_4.pdf]
